# Supplementary material for: Unpruning improvement the quality of tea through increasing the levels of amino acids and reducing contents of flavonoids and caffeine
Source: Front Nutr. 2022 Sep 29;9:1017693. doi: 10.3389/fnut.2022.1017693 (PMC9558131; doi:10.3389/fnut.2022.1017693)
Supplement: Supplementary file 1 [file Table_1.XLSX]

## Sheet: Sheet1
Index	Q1 (Da)	Rt (min)	Molecular Weight (Da)	Formula	Ionization model	Compounds	物质	Class I	物质一级分类	Class II	物质二级分类	CAS	Level	UPTT1	UPTT1	UPTT1	PTT1	PTT1	PTT1	UPTT2	UPTT2	UPTT2	PTT2	PTT2	PTT2	mix01	mix02	mix03	mix04	cpd_ID	kegg_map
CMCP000856	345.07	2.15	344.271	C14H16O10	[M+H]+	Galloylquinic acid	没食子酰奎宁酸	Phenolic acids	酚酸类	Phenolic acids	酚酸类	-	A	3540000	2870000	2880000	1700000	2220000	1940000	2080000	2470000	1770000	2710000	2750000	2300000	2130000	2910000	2070000	2510000	--	--
CMCP001124	915.19	2.44	914.728	C44H34O22	[M+H]+	3,3'-Bis(3,4,5-trihydroxybenzoyl) theasinensin C	3,3'-双没食子酰茶素C	Flavonoids	黄酮	Flavonoid	黄酮	-	A	9580	17900	13500	5650	10000	8510	7980	5530	10200	14300	8620	11100	8700	14900	9170	9110	--	--
CMCP001168	611.13	2.49	610.519	C30H26O14	[M+H]+	Theasinensin C	茶素C	Tannins	鞣质	Tannin	鞣质	-	A	2150000	2390000	2080000	1680000	2040000	1510000	1960000	1720000	1920000	2040000	2190000	2640000	2130000	2020000	2180000	2590000	--	--
CMCP001339	915.16	3.6	914.728	C44H34O22	[M+H]+	3,3',4',5,7-Pentahydroxyflavan-(4->6)-3,3',4',5,7-pentahydroxyflavan; (2R,2'R,3R,3'R,4R)-form, 5'',5'''-Dihydroxy, 3,3'-bis-O-(3,4,5-trihydroxybenzoyl)	3,3',4',5,7-五羟基黄酮-（4→6）-3,3',4',5',7-五羟基黄酮-5'',5'''-二羟基-3,3''-双-O-没食子酸,(2R,2'R,3R,3'R,4R)-构型	Tannins	鞣质	Tannin	鞣质	-	A	424000	555000	523000	369000	343000	346000	467000	461000	333000	441000	383000	388000	386000	454000	454000	378000	--	--
CMCP001482	611.13	2.82	610.519	C30H26O14	[M+H]+	3,3',4',5,5',7-Hexahydroxyflavan-(4->8)-3,3',4',5,5',7-hexahydroxyflavan; (2R,2'R,3S,3'R,4S)-form	3,3',4',5,5',7-六羟基黄酮-（4→8）-3,3',4',5,5',7-六羟基黄酮，(2R,2'R,3S,3'R,4S)-构型	Tannins	鞣质	Tannin	鞣质	-	A	1000000	1120000	905000	907000	969000	742000	759000	669000	980000	1000000	1180000	1190000	926000	1140000	761000	1070000	--	--
CMCP001738	763.14	3.08	762.623	C37H30O18	[M+H]+	3,3',4',5,5',7-Hexahydroxyflavan-(4->8)-3,3',4',5,5',7-hexahydroxyflavan; (all-R)-form, 3'-O-(3,4,5-Trihydroxybenzoyl)	3,3',4',5,5',7-六羟基黄酮-（4→8）-3,3',4',5,5',7-六羟基黄酮-3'-O-没食子酸 (R)-构型	Tannins	鞣质	Tannin	鞣质	86588-88-7	A	17800	35700	29100	9	24800	21800	34700	31500	14800	33700	22500	23300	21500	29800	12800	21400	--	--
CMCP001769	611.13	3.11	610.533	C30H26O14	[M+H]+	3,3',4',5,5',7-Hexahydroxyflavan-(4->8)-3,3',4',5,5',7-hexahydroxyflavan; (all-R)-form	3,3',4',5,5',7-六羟基黄酮-（4→8）-3,3',4',5,5',7-六羟基黄酮（R构型）	Tannins	鞣质	Tannin	鞣质	87392-61-8	A	626000	591000	707000	612000	568000	567000	583000	427000	617000	698000	856000	851000	751000	748000	708000	619000	--	--
CMCP002323	747.15	3.7	746.624	C37H30O17	[M+H]+	3,3',4',5,5',7-Hexahydroxyflavan-(4->8)-3,3',4',5,5',7-hexahydroxyflavan; (all-R)-form, 3''-Deoxy, 3'-O-(3,4,5-trihydroxybenzoyl)	3,3',4',5,5',7-六羟基黄酮-（4→8）-3,3',4',5,5',7-六羟基黄酮-3''-甲氧基-3'-O-(3,4,5-三羟基苯基)	Tannins	鞣质	Tannin	鞣质	-	A	160000	161000	141000	131000	216000	143000	262000	207000	236000	144000	157000	171000	187000	182000	209000	135000	--	--
CMCP002374	339.1	3.76	338.309	C16H18O8	[M+H]+	3-O-p-Coumaroylquinic acid	香豆酰奎宁酸	Phenolic acids	酚酸类	Phenolic acids	酚酸类	-	A	2560000	2900000	2900000	3670000	5020000	3950000	4060000	5030000	4310000	2960000	2650000	2750000	3680000	3860000	4460000	3900000	--	--
CMCP002591	899.16	3.96	898.728	C44H34O21	[M+H]+	3,3',4',5,5',7-Hexahydroxyflavan-(4->8)-3,3',4',5,5',7-hexahydroxyflavan; (all-R)-form, 3''-Deoxy, 3,3'-bis-O-(3,4,5-trihydroxybenzoyl)	3,3',4',5,7-五羟基黄酮-（4→8）二-3,3',4',5',7-五羟基黄酮-3,3''-双-O-没食子酸(R)-构型	Tannins	鞣质	Tannin	鞣质	-	A	331000	377000	347000	228000	235000	274000	238000	286000	222000	316000	269000	239000	281000	346000	261000	265000	--	--
CMCP002620	731.15	3.99	730.625	C37H30O16	[M+H]+	3,3',4',5,7-Pentahydroxyflavan(4->8)-3,3',4',5,7-pentahydroxyflavan; (2R,2'R,3R,3'R,4R)-form, 3'-O-(3,4,5-Trihydroxybenzoyl)	3,3',4',5,7-五羟基黄酮-（4→8）-3,3',4',5',7-五羟基黄酮-3'-O-没食子酸	Tannins	鞣质	Proanthocyanidins	原花青素	-	A	425000	402000	490000	669000	464000	483000	778000	682000	720000	616000	476000	627000	589000	704000	599000	619000	--	--
CMCP002647	627.15	4.03	626.517	C27H30O17	[M+H]+	3,3',4',5,5',7-Hexahydroxyflavone; 3-O-[α-L-Rhamnopyranosyl-(1->6)-β-D-glucopyranoside]	3,3',4',5,5',7-六羟基黄酮-3-O-[α-L-鼠李糖-（1→6）-β-D-葡萄糖]	Flavonoids	黄酮	Flavonoid	黄酮	-	A	57100	68800	76100	98800	75100	53900	44500	39900	54800	53100	85200	43400	51900	65700	55300	59200	--	--
CMCP002658	481.09	4.11	480.376	C21H20O13	[M+H]+	3,3',4',5,5',7-Hexahydroxyflavone; 3-O-β-D-Galactopyranoside	3,3',4',5,5',7-六羟基黄酮-3-O-β-D-葡萄糖	Flavonoids	黄酮	Flavonoid	黄酮	15648-86-9	A	27200000	20500000	23400000	23700000	23200000	22500000	16200000	17900000	22800000	24900000	23800000	22100000	24900000	26600000	22900000	25500000	--	--
CMCP002716	481.09	4.04	480.376	C21H20O13	[M+H]+	3,3',4',5,5',7-Hexahydroxyflavone; 3'-O-β-D-Glucopyranoside	3,3',4',5,5',7-六羟基黄酮-3'-O-β-D-葡萄糖	Flavonoids	黄酮	Flavonoid	黄酮	-	A	24100000	20100000	20100000	17900000	21000000	24500000	16400000	16000000	20200000	22500000	19400000	19200000	22700000	21900000	19800000	21200000	--	--
CMCP002828	757.21	4.22	756.659	C33H40O20	[M+H]+	Quercetin 3-glycosides; Trisaccharides, 3-O-[α-L-Rhamnopyranosyl-(1->2)-[α-L-rhamnopyranosyl-(1->6)]-β-D-glucopyranoside]	槲皮素-3-O-[α-L-鼠李糖-(1→2)-α-L-鼠李糖-(1→6)-β-D-葡萄糖]	Flavonoids	黄酮	Flavonoid	黄酮	-	A	79800	79500	57200	112000	85900	81000	135000	166000	141000	57900	50300	84200	89200	97700	95600	95200	--	--
CMCP002861	883.17	4.25	882.729	C44H34O20	[M+H]+	3,3',4',5,7-Pentahydroxyflavan(4->8)-3,3',4',5,7-pentahydroxyflavan; (2R,2'R,3R,3'R,4R)-form, 3,3'-Bis-O-(3,4,5-trihydroxybenzoyl)	3,3',4',5,7-五羟基黄酮-（4→8）二-3,3',4',5',7-五羟基黄酮-3,3''-双-O-没食子酸,(2R,2'R,3R,3'R,4R)-构型	Tannins	鞣质	Tannin	鞣质	-	A	19700	22200	20400	16100	10200	14600	18300	15700	10800	18000	13700	14000	14100	15500	14300	11900	--	--
CMCP002903	473.1	4.3	472.398	C23H20O11	[M+H]+	3-O-(3,4-Dihydroxy-5-methoxybenzoyl)3,3',4',5,5',7-Hexahydroxyflavan	3-O-(3,4-二羟基-5-甲氧基苯基)-3,3',4',5,5',7-六羟基黄烷	Flavonoids	黄酮	Flavanols	黄烷醇类	-	A	764000	431000	593000	216000	2160000	1420000	51100	76100	864000	4680000	840000	1070000	769000	991000	994000	955000	--	--
CMCP002965	599.19	4.37	598.55	C27H34O15	[M+H]+	Phloretin-3,5-di-C-glucoside	根皮素-3,5-二碳黄酮	Flavonoids	黄酮	Flavonoid carbonoside	黄酮碳糖苷	-	A	645000	563000	469000	600000	784000	599000	850000	708000	722000	667000	559000	618000	583000	617000	676000	633000	--	--
CMCP003010	741.22	4.42	740.659	C33H40O19	[M+H]+	Kaempferol-3-O-[4-Hydroxy-E-cinnamoyl-(->6)-β-D-glucopyranosyl-(1->4)-α-L-rhamnopyranoside]	山奈酚-3-O-[4-羟基香豆酰-α-L-鼠李糖-(1→6)-β-D-葡萄糖]	Flavonoids	黄酮	Flavonoids	黄酮	-	A	29800	33900	19500	43100	70300	36000	75400	99500	60900	43900	32900	53600	39000	41100	63900	52400	--	--
CMCP003212	783.23	4.64	782.696	C35H42O20	[M+H]+	Kaempferol 3-glycosides; Triglycosides, 3-O-[4-O-acetyl-4-Hydroxy-E-cinnamoyl-α-L-rhamnopyranosyl-(1->6)-β-D-glucopyranoside]	山奈酚-[α-L-鼠李糖-(1→2)-4-O-乙酰香豆酰基(1→6)-β-D-葡萄糖]	Flavonoids	黄酮	Flavonoid	黄酮	-	A	41400	17800	23400	31800	18000	15200	7270	13500	6050	1800	3160	4610	18400	24300	25200	26400	--	--
CMCP003311	783.23	4.74	782.696	C35H42O20	[M+H]+	Kaempferol 3-glycosides; Triglycosides, 3-O-[α-L-Rhamnopyranosyl-(1->3)-4-O-acetyl-4-Hydroxy-E-cinnamoyl-(1->6)-β-D-glucopyranoside]，isomer	山奈酚-[α-L-鼠李糖-(1→2)-4-O-乙酰香豆酰基(1→6)-β-D-葡萄糖]（异构体）	Flavonoids	黄酮	Flavonoid	黄酮	-	A	57600	17200	24200	30800	21000	14500	6730	11700	5230	1290	2240	6380	20300	25400	21300	23700	--	--
CMCP003380	457.1	4.82	456.399	C23H20O10	[M+H]+	3,3',4',5,7-Pentahydroxyflavan; (2R,3R)-form, 3-O-(3,4-Dihydroxy-5-methoxybenzoyl)	3-O-(3,4-二羟基-5-甲氧基苯基)-3,3',4',5,7-五羟基黄烷	Flavonoids	黄酮	Flavanols	黄烷醇类	-	A	565000	493000	592000	364000	4610000	1500000	130000	142000	4860000	7500000	3380000	3400000	1960000	2430000	2250000	2160000	--	--
CMCP003396	427.09	4.84	426.373	C22H18O9	[M+H]+	(+)-Afzelechin-3-O-gallate	没食子酰阿福豆素	Flavonoids	黄酮	Flavanols	黄烷醇类	-	A	7520000	5620000	7310000	7250000	6750000	5500000	4100000	3810000	3430000	9350000	6110000	6450000	6080000	7800000	6610000	6830000	--	--
CMCP004725	741.17	6.44	740.662	C39H32O15	[M+H]+	Astragalin; 2'',6''-Bis-O-(4-hydroxy-E-cinnamoyl)	2'',6''-双-O-4-羟基香豆酰山奈酚	Flavonoids	黄酮	Flavonoid	黄酮	-	A	7500000	8860000	9100000	5910000	5540000	6770000	6710000	6480000	6140000	6530000	5120000	4240000	6170000	8570000	6720000	6020000	--	--
CMCP004906	741.17	6.57	740.662	C39H32O15	[M+H]+	Astragalin; 2'',6''-Bis-O-(4-hydroxy-E-cinnamoyl)，isomer	2'',6''-双-O-4-羟基香豆酰山奈酚（异构体）	Flavonoids	黄酮	Flavonoid	黄酮	-	A	4330000	4880000	4740000	4090000	3760000	4090000	3880000	4360000	4350000	4970000	3400000	3110000	3420000	4810000	4080000	4160000	--	--
GQ512002	623.1	4.4	624.14	C28H32O16	[M-H]-	Isorhamnetin-3-O-rutinoside	异鼠李素-3-O-芸香糖苷	Flavonoids	黄酮	Flavonols	黄酮醇	604-80-8	B	345000	308000	391000	411000	406000	454000	458000	355000	536000	494000	654000	542000	393000	406000	368000	319000	--	--
GQ512003	307.18	3.05	306.152	C15H22O3N4	[M+H]+	Fer-agmatine	阿魏酸精胺	Alkaloids	生物碱	Phenolamine	酚胺	-	B	3290000	3280000	2750000	3540000	4420000	3020000	2680000	2850000	2730000	3440000	3430000	3310000	2780000	3340000	4240000	3510000	--	--
GQ512005	595.16	4.32	594.132	C27H30O15	[M+H]+	Kaempferol-3-O-glucoside-7-O-rhamnoside	山奈酚-3-O-葡萄糖苷-7-O-鼠李糖苷	Flavonoids	黄酮	Flavonols	黄酮醇	-	B	1960000	1910000	1590000	2120000	2360000	2140000	1500000	1160000	1590000	2760000	1980000	1940000	2150000	2180000	1940000	1910000	--	--
GQ512006	611.16	4.09	610.126	C27H30O16	[M+H]+	Quercetin-3-O-glucoside-7-O-rhamnoside	槲皮素-3-O-葡萄糖苷-7-O-鼠李糖苷	Flavonoids	黄酮	Flavonols	黄酮醇	-	B	1920000	2160000	1690000	2430000	2070000	2250000	2160000	2350000	2410000	2440000	2580000	2420000	1840000	2340000	2620000	2570000	--	--
Huasheng_mad2400	471.1	4.87	472.082	C23H20O11	[M-H]-	p-Coumaroylferuloyltartaric acid	对香豆酰阿魏酰酒石酸	Phenolic acids	酚酸类	Phenolic acids	酚酸类	-	B	97100	71800	124000	189000	99600	133000	139000	129000	64100	265000	221000	179000	127000	118000	115000	116000	--	--
Li512112	563.1	4.95	564.088	C25H24O15	[M-H]-	Isorhamnetin hexose-malonate	异鼠李亭丙二酸己糖	Flavonoids	黄酮	Flavonols	黄酮醇	-	B	95200	85200	74600	158000	223000	164000	157000	176000	149000	122000	124000	130000	137000	125000	131000	142000	--	--
Li512115	515.12	4.66	516.105	C25H24O12	[M-H]-	3,4-Dicaffeoylquinic acid	3,4-二甲酰奎宁酸	Phenolic acids	酚酸类	Phenolic acids	酚酸类	14534-61-3	A	4160000	4820000	4950000	5500000	4950000	3680000	7490000	8800000	7550000	6530000	4120000	3920000	5300000	5500000	4440000	4470000	--	--
Li512117	611.16	4.39	610.126	C27H30O16	[M+H]+	Quercetin 3-O-rhanosylgalactoside	槲皮素3-O-鼠李糖基半乳糖苷	Flavonoids	黄酮	Flavonols	黄酮醇	-	B	1850000	2170000	1980000	2880000	2070000	2470000	1960000	1940000	2330000	2160000	2780000	1950000	1910000	2420000	2530000	2310000	--	--
Qingke_Rfmb087-1-1	311.22	6.51	312.208	C18H32O4	[M-H]-	13-Oxo-9-hydroxy-10-octadecenoic acid	13-氧代-9-羟基-10-十八酸	Lipids	脂质	Free fatty acids	游离脂肪酸	-	B	115000	114000	113000	135000	135000	149000	76800	101000	77800	75300	64700	70600	110000	112000	107000	115000	--	--
Qingke_Rfmb089-2-3	313.24	6.48	314.222	C18H34O4	[M-H]-	9,10-Dihydroxy-12-octadecenoic acid	9,10-二羟基-12-十八酸	Lipids	脂质	Free fatty acids	游离脂肪酸	263399-34-4	A	1130000	894000	1100000	3060000	4100000	2420000	2570000	1870000	1810000	2000000	1950000	2210000	1940000	1980000	1970000	1990000	--	--
Qingke_Rfmb090-1-3	295.23	8.03	296.214	C18H32O3	[M-H]-	13-Hydroxy-9,11-octadecadienoic acid	13-羟基-9,11-十八碳二烯酸	Lipids	脂质	Free fatty acids	游离脂肪酸	5204-88-6	A	1530000	1630000	1500000	1700000	1740000	1850000	1180000	1310000	1110000	824000	740000	799000	1390000	1380000	1330000	1310000	--	--
Qingke_Rfmb091-1-1	295.23	8.03	296.214	C18H32O3	[M-H]-	9-Hydroxy-10,12-octadecadienoic acid	9-羟基-10,12-十八碳二烯酸	Lipids	脂质	Free fatty acids	游离脂肪酸	15514-85-9	A	1500000	1500000	1360000	1620000	1690000	1690000	1070000	1210000	980000	797000	706000	788000	1330000	1370000	1270000	1250000	--	--
Qingke_Rfmb257-der01-3	519.19	4.67	520.168	C26H32O11	[M-H]-	Pinoresinol-Hexose	松脂醇-己糖	Lignans and Coumarins	木脂素和香豆素	Lignans	木脂素	-	B	2020000	2020000	2370000	2340000	3030000	2400000	4690000	4930000	4670000	1830000	2320000	1840000	2390000	2500000	2730000	2520000	--	--
Qingke_Rfmb319-1-2	130.09	1.41	129.07	C6H11NO2	[M+H]+	Pipecolic acid	哌啶酸	Amino acids and derivatives	氨基酸及其衍生物	Amino acids and derivatives	氨基酸及其衍生物	4043-87-2	B	593000	547000	596000	456000	402000	449000	615000	559000	764000	539000	413000	505000	539000	598000	602000	646000	--	--
Qingke_Rfmb320-1-3	144.1	1.39	143.085	C7H13NO2	[M+H]+	1,2-N-Methylpipecolic acid	1,2-N-甲基哌啶酸	Amino acids and derivatives	氨基酸及其衍生物	Amino acids and derivatives	氨基酸及其衍生物	7730-87-2	B	274000	214000	253000	216000	190000	245000	210000	188000	223000	216000	268000	251000	216000	248000	224000	223000	--	--
YC512118	282.28	10.19	281.249	C18H35NO	[M+H]+	Octadecenoic amide	十八碳酰胺	Others	其它类	Others	其它	-	A	56400	38300	33600	33800	56200	59300	34200	57600	31300	65500	44300	52000	65000	98500	89200	81600	--	--
mws0005	161.1	3.22	160.091	C10H12N2	[M+H]+	Tryptamine	色胺	Alkaloids	生物碱	Plumerane	吲哚类生物碱	61-54-1	B	151000	143000	141000	122000	177000	121000	85900	89700	90100	130000	113000	116000	120000	148000	173000	150000	C00398	ko00380,ko00901,ko01100,ko01110
mws0014	193.06	4.53	194.049	C10H10O4	[M-H]-	Ferulic acid	阿魏酸	Phenolic acids	酚酸类	Phenolic acids	酚酸类	1135-24-6	B	177000	226000	226000	424000	519000	394000	236000	337000	245000	219000	250000	246000	337000	299000	346000	298000	C01494	ko00940,ko01100,ko01110
mws0018	203	1.1	202.197	C10H26N4	[M+H]+	Spermine	精胺	Alkaloids	生物碱	Phenolamine	酚胺	71-44-3	A	6680000	6820000	7080000	7650000	7110000	7220000	7880000	7330000	7580000	7950000	6980000	7540000	7670000	9170000	8940000	8370000	C00750	ko00330,ko00410,ko00480,ko01100
mws0024	169.02	2.25	170.015	C7H6O5	[M-H]-	Gallic acid	没食子酸	Flavonoids	黄酮	Flavanols	黄烷醇类	149-91-7	A	3450000	3620000	3690000	3190000	2920000	3310000	2060000	2280000	2050000	2440000	2440000	2190000	2890000	3200000	2910000	2700000	C01424	--
mws0028	167	3.79	168.035	C8H8O4	[M-H]-	Vanillic acid	香草酸	Phenolic acids	酚酸类	Phenolic acids	酚酸类	121-34-6	B	23100	21200	23300	17500	21200	27400	25200	27500	19400	33800	28700	31000	23000	22400	24000	20500	C06672	--
mws0034	457.2	3.78	458.068	C22H18O11	[M-H]-	Epigallocatechin gallate	表没食子儿茶素没食子酸酯	Flavonoids	黄酮	Flavanols	黄烷醇类	989-51-5	B	5570000	5290000	5530000	5250000	4910000	4380000	4970000	4990000	4470000	4820000	5490000	4170000	4930000	4910000	5210000	5080000	C09731	--
mws0042	305	3.03	306.061	C15H14O7	[M-H]-	(-)-Epigallocatechin	(-)-表没食子儿茶素	Flavonoids	黄酮	Flavanols	黄烷醇类	970-74-1	B	38000000	33300000	33000000	39400000	34100000	35400000	35400000	38400000	39000000	39000000	36800000	38000000	41400000	37800000	39200000	35200000	C12136	ko00941,ko01110
mws0044	303.06	4.59	304.047	C15H12O7	[M-H]-	Taxifolin	紫杉叶素	Flavonoids	黄酮	Dihydroflavonol	二氢黄酮醇	480-18-2	B	227000	200000	217000	308000	214000	325000	692000	614000	611000	421000	466000	457000	320000	324000	318000	345000	C01617	ko00941,ko01100,ko01110
mws0045	449.1	4.78	448.082	C21H20O11	[M+H]+	Quercitrin	槲皮苷	Flavonoids	黄酮	Flavonols	黄酮醇	522-12-3	B	2110000	816000	665000	4650000	348000	1540000	129000	167000	209000	2220000	1430000	407000	1830000	1940000	1550000	1670000	--	--
mws0049	307	2.84	306.061	C15H14O7	[M+H]+	(+)-Gallocatechin	(+)-没食子儿茶素	Flavonoids	黄酮	Flavanols	黄烷醇类	970-73-0	B	2040000	1950000	1890000	2350000	2390000	1530000	1730000	1940000	1810000	1960000	2400000	1910000	2090000	1690000	1860000	1690000	C12127	ko00941,ko01110
mws0054	289.08	3.49	290.067	C15H14O6	[M-H]-	Catechin	儿茶素	Flavonoids	黄酮	Flavanols	黄烷醇类	154-23-4	A	31500000	33800000	34300000	34900000	32800000	35000000	38600000	37300000	38800000	39000000	38800000	38700000	33900000	35100000	35100000	33800000	C06562	ko00941,ko01110
mws0058	299.06	6.1	300.053	C16H12O6	[M-H]-	Diosmetin	香叶木素	Flavonoids	黄酮	Flavonoid	黄酮	520-34-3	B	720000	322000	433000	968000	1140000	1060000	1390000	657000	553000	849000	597000	1230000	877000	880000	817000	783000	--	--
mws0059	609.1	4.23	610.126	C27H30O16	[M-H]-	Rutin	芦丁	Flavonoids	黄酮	Flavonols	黄酮醇	153-18-4	A	24000000	25500000	18600000	24200000	31200000	26600000	30600000	31600000	31700000	24800000	37600000	31100000	27300000	29200000	28800000	27200000	--	--
mws0064	287.06	5.53	288.053	C15H12O6	[M-H]-	Eriodictyol	圣草酚	Flavonoids	黄酮	Dihydroflavone	二氢黄酮	552-58-9	B	320000	289000	329000	607000	652000	852000	788000	651000	631000	675000	528000	532000	548000	539000	599000	544000	C05631	ko00941,ko01100,ko01110
mws0066	315.06	6.31	316.047	C16H12O7	[M-H]-	Isorhamnetin	异鼠李素	Flavonoids	黄酮	Flavonols	黄酮醇	480-19-3	A	35500	31600	33100	54500	75700	57300	19900	13400	17700	16800	29500	21400	38600	40100	38200	37800	C10084	--
mws0072	433.11	4.25	432.088	C21H20O10	[M+H]+	Apigenin 5-O-glucoside	芹菜素 5-O-葡萄糖苷	Flavonoids	黄酮	Flavonoid	黄酮	28757-27-9	B	133000	82300	47600	186000	225000	115000	54800	35200	47000	138000	131000	184000	113000	159000	109000	87800	--	--
mws0089	447.09	4.65	448.082	C21H20O11	[M-H]-	Kaempferol 7-O-glucosdie	山奈酚 7-O-葡萄糖苷	Flavonoids	黄酮	Flavonols	黄酮醇	16290-07-6	A	13800000	12000000	13000000	14900000	16600000	15500000	16700000	13900000	17100000	19500000	15300000	17200000	14200000	14500000	13000000	14100000	--	--
mws0093	179.08	4.36	180.07	C10H12O3	[M-H]-	Coniferyl alcohol	松柏醇	Phenolic acids	酚酸类	Phenolic acids	酚酸类	458-35-5	B	101000	106000	118000	220000	331000	246000	166000	173000	201000	121000	109000	109000	172000	178000	191000	190000	C00590	ko00940,ko00998,ko01100,ko01110
mws0097	357.14	5.86	358.125	C20H22O6	[M-H]-	Pinoresinol	松脂醇	Lignans and Coumarins	木脂素和香豆素	Lignans	木脂素	487-36-5	A	2990000	2840000	2650000	4880000	6090000	4960000	4360000	4040000	3830000	3560000	3630000	3650000	3930000	4020000	3920000	3900000	--	--
mws0103	146.1	4.99	145.047	C9H7NO	[M+H]+	Indole-3-carboxaldehyde	吲哚-3-甲醛	Alkaloids	生物碱	Plumerane	吲哚类生物碱	487-89-8	B	140000	144000	145000	132000	156000	149000	114000	128000	110000	92900	93300	88800	132000	138000	144000	127000	C08493	--
mws0119	227.2	9.85	228.19	C14H28O2	[M-H]-	Myristic Acid	肉豆蔻酸	Lipids	脂质	Free fatty acids	游离脂肪酸	544-63-8	A	14100000	13300000	11500000	12900000	13500000	13700000	16900000	19100000	16900000	11200000	11700000	11900000	12200000	16100000	14600000	12200000	--	--
mws0133	123.1	1.99	122.043	C6H6N2O	[M+H]+	Nicotinamide	烟酰胺	Others	其它类	Vitamin	维生素	98-92-0	A	6890000	6660000	6900000	7480000	8320000	7540000	5800000	5650000	5980000	5460000	5010000	4740000	6720000	7590000	7060000	7040000	C00153	ko00760,ko01100
mws0145	151.05	4.59	152.041	C8H8O3	[M-H]-	2-Methoxybenzoic acid	邻甲氧基苯甲酸	Phenolic acids	酚酸类	Phenolic acids	酚酸类	529-75-9	B	74800	83300	72000	47900	32000	69100	42100	37800	40500	55800	50500	68500	46100	52100	54800	46100	--	--
mws0154	173.05	1.44	174.044	C7H10O5	[M-H]-	Shikimic acid	(-)-莽草酸	Organic acids	有机酸	Organic acids	有机酸	138-59-0	B	1740000	1500000	1390000	1980000	1970000	2030000	1570000	1450000	1350000	1580000	1550000	1670000	1630000	1480000	1560000	1540000	C00493	ko00400,ko01100,ko01110,ko01230
mws0169	595	3.1	630.107	C27H31ClO15	[M-Cl]+	Cyanidin 3-rutinoside(Keracyanin chloride)	矢车菊素-3-芸香糖苷	Flavonoids	黄酮	Anthocyanins	花青素	18719-76-1	B	343000	489000	440000	356000	574000	368000	780000	576000	634000	246000	369000	275000	595000	575000	417000	524000	--	--
mws0171	611	2.76	611.133	C27H31O16	[M]+	Cyanin chloride	氯化花青素苷	Flavonoids	黄酮	Anthocyanins	花青素	2611-67-8	B	2440000	2210000	2100000	1740000	2170000	1980000	2440000	2170000	2270000	2110000	2580000	2380000	2080000	2320000	2380000	2420000	--	--
mws0175	493.14	3.24	493.112	C23H25O12	[M]+	Oenin chloride	氯化锦葵色素-3-葡糖苷	Flavonoids	黄酮	Anthocyanins	花青素	7228-78-6	B	21600	28500	20500	19900	21400	16700	13400	20900	16200	21100	24100	19300	14300	28200	24700	20700	--	--
mws0179	367	4.17	368.093	C17H20O9	[M-H]-	Chlorogenic acid methyl ester	绿原酸甲酯	Phenolic acids	酚酸类	Phenolic acids	酚酸类	29708-87-0	B	45600	58000	39700	77300	92200	80000	87600	101000	97300	71000	90300	104000	69700	65700	68000	63300	--	--
mws0183	153.1	3.05	154.021	C7H6O4	[M-H]-	Protocatechuic acid	原儿茶酸	Flavonoids	黄酮	Flavanols	黄烷醇类	99-50-3	A	4450000	4700000	5040000	6120000	6360000	6650000	4640000	5550000	4410000	5030000	4390000	4610000	6150000	5540000	5710000	5800000	C00230	ko00400,ko01100,ko01110
mws0191	118.1	1.28	117.07	C5H11NO2	[M+H]+	Betaine	甜菜碱	Alkaloids	生物碱	Alkaloids	生物碱	107-43-7	A	1040000	1240000	932000	1490000	1300000	1360000	1310000	1270000	1280000	1290000	1250000	1490000	1320000	1530000	1380000	1270000	C00719	ko00260,ko01100,ko02010
mws0192	117.03	1.81	118.021	C4H6O4	[M-H]-	Succinic acid	琥珀酸	Organic acids	有机酸	Organic acids	有机酸	110-15-6	A	8190000	9770000	9180000	10500000	10100000	10500000	16100000	15800000	14800000	17400000	17100000	16200000	12100000	11000000	11600000	10200000	C00042	ko00020,ko00190,ko00250,ko00310,ko00350,ko00360,ko00620,ko00630,ko00640,ko00650,ko00760,ko00920,ko01100,ko01110,ko01200
mws0208	145.06	3.13	146.049	C6H10O4	[M-H]-	Adipic Acid	己二酸	Organic acids	有机酸	Organic acids	有机酸	124-04-9	B	404000	392000	452000	437000	625000	494000	506000	689000	504000	539000	580000	565000	500000	446000	460000	475000	C06104	ko01100
mws0213	151	1.27	152.058	C5H12O5	[M-H]-	Ribitol	阿东糖醇	Others	其它类	Saccharides and Alcohols	糖及醇类	488-81-3	B	263000	258000	306000	120000	107000	137000	73300	93500	79700	123000	100000	90300	129000	103000	123000	126000	--	--
mws0214	181	1.24	182.067	C6H14O6	[M-H]-	D-Sorbitol	D-山梨糖醇	Others	其它类	Saccharides and Alcohols	糖及醇类	50-70-4	B	170000	162000	200000	75600	57500	72900	104000	81000	72300	77300	68400	65800	91900	74200	81900	95700	C00794	ko00051,ko00052,ko01100,ko02010
mws0219	132	1.21	133.03	C4H7NO4	[M-H]-	L-AsparticAcid	L-天冬氨酸	Amino acids and derivatives	氨基酸及其衍生物	Amino acids and derivatives	氨基酸及其衍生物	56-84-8	A	4220000	3840000	4370000	4190000	4970000	4120000	3500000	3710000	4340000	3190000	3310000	2720000	4180000	3700000	4030000	3670000	C00049	ko00220,ko00250,ko00260,ko00261,ko00270,ko00300,ko00340,ko00410,ko00460,ko00710,ko00760,ko00770,ko00970,ko01100,ko01110,ko01200,ko01210,ko01230,ko02010
mws0227	132.1	1.7	131.085	C6H13NO2	[M+H]+	L-Leucine	L-亮氨酸	Amino acids and derivatives	氨基酸及其衍生物	Amino acids and derivatives	氨基酸及其衍生物	61-90-5	A	11800000	14000000	11800000	17700000	15400000	15200000	4710000	4870000	4930000	5420000	3960000	5190000	12500000	12800000	14300000	14900000	C00123	ko00280,ko00290,ko00966,ko00970,ko01100,ko01110,ko01210,ko01230,ko02010
mws0232	377	3.71	376.12	C17H20N4O6	[M+H]+	Riboflavin	核黄素	Others	其它类	Vitamin	维生素	83-88-5	A	80000	59700	105000	127000	244000	220000	121000	144000	142000	100000	92700	94800	132000	152000	137000	144000	C00255	ko00740,ko01100,ko01110,ko02010
mws0237	187.1	4.93	188.093	C9H16O4	[M-H]-	Anchoic Acid	壬二酸	Organic acids	有机酸	Organic acids	有机酸	123-99-9	B	3350000	3400000	3640000	3060000	3610000	2930000	3560000	4310000	3400000	2430000	3030000	2920000	3100000	3010000	3240000	3210000	C08261	--
mws0248	243.1	1.69	244.058	C9H12N2O6	[M-H]-	Uridine	尿嘧啶核苷	Nucleotides and derivatives	核苷酸及其衍生物	Nucleotides and derivatives	核苷酸及其衍生物	58-96-8	A	405000	277000	300000	447000	849000	493000	351000	652000	972000	311000	399000	570000	373000	565000	587000	728000	C00299	ko00240,ko01100,ko02010
mws0250	182.1	1.63	181.065	C9H11NO3	[M+H]+	L-(-)-Tyrosine	L-(-)-酪氨酸	Amino acids and derivatives	氨基酸及其衍生物	Amino acids and derivatives	氨基酸及其衍生物	60-18-4	A	2100000	2490000	2090000	4980000	4770000	4060000	986000	946000	903000	1790000	1040000	1590000	2520000	2740000	3390000	3500000	C00082	ko00130,ko00261,ko00350,ko00360,ko00400,ko00460,ko00730,ko00940,ko00950,ko00965,ko00966,ko00970,ko01100,ko01110,ko01210,ko01230
mws0254	156.1	1.18	155.061	C6H9N3O2	[M+H]+	L-Histidine	L-组氨酸	Amino acids and derivatives	氨基酸及其衍生物	Amino acids and derivatives	氨基酸及其衍生物	71-00-1	B	228000	247000	338000	345000	263000	318000	96400	105000	85200	84600	73500	53800	252000	264000	236000	249000	C00135	ko00340,ko00410,ko00970,ko01100,ko01110,ko01230,ko02010
mws0255	112	1.25	111.038	C4H5N3O	[M+H]+	Cytosine	胞嘧啶	Nucleotides and derivatives	核苷酸及其衍生物	Nucleotides and derivatives	核苷酸及其衍生物	71-30-7	B	105000	83200	95500	126000	144000	132000	44900	49800	51000	63500	71600	62400	78900	79400	92100	76400	C00380	ko00240,ko01100
mws0256	118.1	1.34	117.07	C5H11NO2	[M+H]+	L-Valine	L-缬氨酸	Amino acids and derivatives	氨基酸及其衍生物	Amino acids and derivatives	氨基酸及其衍生物	72-18-4	B	36500000	41100000	39000000	52100000	51100000	42900000	7600000	7850000	7160000	10600000	7340000	8540000	31100000	35100000	32500000	34200000	C00183	ko00280,ko00290,ko00460,ko00770,ko00966,ko00970,ko01100,ko01110,ko01210,ko01230,ko02010
mws0258	132	1.73	131.085	C6H13NO2	[M+H]+	L-Isoleucine	L-异亮氨酸	Amino acids and derivatives	氨基酸及其衍生物	Amino acids and derivatives	氨基酸及其衍生物	73-32-5	A	27900000	32200000	28300000	40100000	36400000	37800000	12400000	13300000	12900000	13400000	10700000	12500000	30100000	29900000	32400000	32700000	C00407	ko00280,ko00290,ko00460,ko00960,ko00966,ko00970,ko01100,ko01110,ko01210,ko01230,ko02010
mws0263	128.03	1.42	129.036	C5H7NO3	[M-H]-	L-PyroglutamicAcid	L-焦谷氨酸	Amino acids and derivatives	氨基酸及其衍生物	Amino acids and derivatives	氨基酸及其衍生物	98-79-3	B	18200	15500	18900	21000	16300	18600	19500	24600	33700	21300	29500	21200	22000	23000	20400	19500	--	--
mws0264	341	1.22	342.096	C12H22O11	[M-H]-	D-(+)-TrehaloseAnhydrous	D-(+)-无水海藻糖	Others	其它类	Saccharides and Alcohols	糖及醇类	99-20-7	B	801000	749000	846000	1180000	955000	1360000	1120000	1110000	903000	1800000	1280000	1460000	1130000	1150000	1370000	1110000	--	--
mws0275	133	1.47	134.015	C4H6O5	[M-H]-	L-(-)-Malic acid	L-(-)-苹果酸	Organic acids	有机酸	Organic acids	有机酸	636-61-3	A	2070000	1620000	1990000	2320000	2330000	2260000	3000000	3070000	2670000	4460000	4870000	6320000	1890000	2650000	1930000	2130000	C00497	ko00650,ko01100
mws0277	191	1.63	192.053	C7H12O6	[M-H]-	Kinic acid	奎尼酸	Organic acids	有机酸	Organic acids	有机酸	77-95-2	B	7560000	10900000	7600000	15200000	15300000	17000000	24200000	18300000	19400000	17600000	15100000	13800000	18000000	12100000	15200000	15600000	C00296	ko00400,ko01100
mws0281	191	1.34	192.018	C6H8O7	[M-H]-	Citric Acid	柠檬酸	Organic acids	有机酸	Organic acids	有机酸	77-92-9	A	10500000	6180000	11500000	12700000	11800000	12800000	15600000	15800000	15800000	19000000	20500000	21700000	12000000	14200000	11100000	11200000	C00158	ko00020,ko00250,ko00630,ko01100,ko01110,ko01200,ko01210,ko01230
mws0282	203	2.97	204.08	C11H12N2O2	[M-H]-	L-Tryptophan	L-色氨酸	Amino acids and derivatives	氨基酸及其衍生物	Amino acids and derivatives	氨基酸及其衍生物	73-22-3	A	12700000	13500000	12100000	12000000	14300000	12900000	8420000	10100000	9120000	7930000	7080000	8020000	12500000	11600000	12000000	12100000	C00078	ko00260,ko00380,ko00400,ko00901,ko00966,ko00970,ko01100,ko01110,ko01210,ko01230
mws0289	478.1	7.99	479.268	C23H46NO7P	[M-H]-	LysoPE 18:1	溶血磷脂酰乙醇胺 18:1	Lipids	脂质	LPE	溶血磷脂酰乙醇胺	89576-29-4	B	2950000	2890000	3240000	4420000	5190000	4380000	2810000	3610000	2730000	1620000	1950000	1850000	3350000	3870000	3500000	3410000	--	--
mws0328	181	2.98	182.049	C9H10O4	[M-H]-	DL-P-hydroxyphenyllactic acid	对-羟苯基乳酸	Organic acids	有机酸	Organic acids	有机酸	6482-9-80	B	72500	92100	74600	76700	59800	69500	22700	30700	22900	72800	62000	46200	54100	49400	57400	63400	--	--
mws0341	131.08	4.01	132.07	C6H12O3	[M-H]-	(S)-(-)-2-Hydroxyisocaproic acid	羟基异己酸乙酯	Organic acids	有机酸	Organic acids	有机酸	13748-90-8	B	119000	152000	131000	124000	136000	115000	43500	38400	42900	49000	41900	41800	96500	81100	98300	101000	--	--
mws0344	165.05	1.45	166.038	C5H10O6	[M-H]-	D-Xylonic acid	D-木糖酸	Organic acids	有机酸	Organic acids	有机酸	526-91-0	B	1980000	1990000	2120000	2360000	2520000	2040000	2260000	1910000	2020000	2320000	1960000	1860000	2120000	1930000	1970000	1970000	--	--
mws0351	457.08	3.8	458.068	C22H18O11	[M-H]-	Gallate catechin gallate	没食子儿茶没食子酸酯	Flavonoids	黄酮	Flavanols	黄烷醇类	4233-96-9	A	4780000	5280000	4990000	4830000	4580000	3960000	4420000	4480000	3890000	3850000	4570000	4140000	4500000	4650000	4750000	4020000	--	--
mws0352	179	3.03	180.056	C7H8N4O2	[M-H]-	Theophylline	茶碱	Alkaloids	生物碱	Alkaloids	生物碱	58-55-9	A	50600	49800	61900	66200	50500	61800	44300	53800	51100	30600	39000	35200	42200	43800	47900	44400	C07130	ko00232,ko01100,ko01110
mws0359	241.22	10.38	242.205	C15H30O2	[M-H]-	Pentadecanoic Acid	十五烷酸	Lipids	脂质	Free fatty acids	游离脂肪酸	1002-84-2	A	26500	39200	20600	17000	20400	20400	39600	44300	38700	17500	17400	15800	15700	23300	19700	13300	--	--
mws0361	253.22	9.85	254.205	C16H30O2	[M-H]-	Palmitoleic Acid	棕榈油酸	Lipids	脂质	Free fatty acids	游离脂肪酸	373-49-9	B	13300	10400	11700	7710	12300	11300	59300	65500	47100	16800	20400	17400	17900	24700	23200	17500	C08362	ko00061
mws0366	277.22	9.78	278.205	C18H30O2	[M-H]-	γ-Linolenic Acid	γ-亚麻酸	Lipids	脂质	Free fatty acids	游离脂肪酸	506-26-3	A	12600000	12200000	12500000	12600000	15400000	13800000	10100000	10000000	10200000	9600000	9360000	8700000	11000000	12500000	11500000	10700000	--	--
mws0367	277.1	9.56	278.205	C18H30O2	[M-H]-	α-Linolenic Acid	α-亚麻酸	Lipids	脂质	Free fatty acids	游离脂肪酸	463-40-1	A	30100	30400	31200	32100	37200	33100	25400	24600	23100	22100	23400	20700	26900	31500	28300	23500	C06427	ko00592,ko01040,ko01100,ko01110
mws0376	115	1.61	116.006	C4H4O4	[M-H]-	Fumaric acid	延胡索酸(富马酸,反丁烯二酸)	Organic acids	有机酸	Organic acids	有机酸	110-17-8	B	315000	288000	286000	299000	300000	276000	252000	292000	236000	391000	421000	319000	292000	293000	268000	274000	C00122	ko00020,ko00190,ko00220,ko00250,ko00350,ko00360,ko00620,ko00650,ko00760,ko01100,ko01110,ko01200
mws0383	267.23	10.47	268.219	C17H32O2	[M-H]-	Cis-10-Heptadecenoic Acid	顺-10-十七碳烯酸	Lipids	脂质	Free fatty acids	游离脂肪酸	29743-97-3	B	174000	161000	143000	162000	191000	161000	186000	201000	192000	86600	88700	69200	124000	218000	141000	95100	--	--
mws0425	129	2.15	130.021	C5H6O4	[M-H]-	Citraconic acid	甲基马来酸	Organic acids	有机酸	Organic acids	有机酸	498-23-7	B	187000	168000	199000	138000	150000	158000	131000	135000	135000	147000	149000	149000	138000	136000	131000	144000	C02226	ko00290,ko00660,ko01100,ko01210
mws0437	151.15	1.23	152.058	C5H12O5	[M-H]-	D-Arabitol	D-阿拉伯糖醇	Others	其它类	Saccharides and Alcohols	糖及醇类	488-82-4	B	222000	196000	246000	95800	87500	101000	58600	84800	73700	104000	76200	76400	104000	87900	106000	98900	C01904	ko00040,ko01100
mws0438	151.15	1.26	152.058	C5H12O5	[M-H]-	L-Arabitol	L-(-)-阿拉伯醇	Others	其它类	Saccharides and Alcohols	糖及醇类	7643-75-6	B	167000	165000	202000	74100	65300	85400	54200	64100	65400	82900	66200	62000	93300	73400	87300	88000	--	--
mws0444	152.04	1.84	153.036	C7H7NO3	[M-H]-	3-Aminosalicylic acid	3-氨基水杨酸	Phenolic acids	酚酸类	Phenolic acids	酚酸类	570-23-0	B	76600	68700	62700	119000	126000	98600	93100	80200	89100	49000	39900	64900	139000	103000	113000	118000	--	--
mws0458	151.05	4.47	152.041	C8H8O3	[M-H]-	Vanillin	香兰素	Phenolic acids	酚酸类	Phenolic acids	酚酸类	121-33-5	B	868000	908000	1050000	670000	866000	861000	1120000	1490000	1100000	1140000	1140000	1040000	960000	909000	931000	941000	C00755	ko00999,ko01100,ko01110
mws0473	131.04	2.58	132.035	C5H8O4	[M-H]-	2-Methylsuccinic acid	2-甲基丁二酸	Organic acids	有机酸	Organic acids	有机酸	498-21-5	B	5250000	4890000	5770000	3650000	3610000	4110000	4200000	4640000	3940000	3320000	3180000	1930000	4830000	4140000	4100000	4240000	--	--
mws0489	149.03	3.07	150.026	C8H6O3	[M-H]-	Benzoylformic acid	苯乙醛酸	Organic acids	有机酸	Organic acids	有机酸	611-73-4	B	226000	303000	279000	158000	175000	179000	30300	34700	26700	45200	35600	40900	156000	162000	154000	149000	C02137	ko00360,ko01100
mws0491	122.1	2.89	121.082	C8H11N	[M+H]+	Phenethylamine	2-苯乙胺	Others	其它类	Others	其它	64-04-0	B	4720000	5710000	5290000	4840000	5470000	5960000	5010000	3240000	3580000	2890000	3760000	2470000	4710000	4830000	4690000	4660000	C05332	ko00360,ko01100
mws0497	165.06	4.37	166.055	C9H10O3	[M-H]-	L-(-)-3-Phenyllactic acid	L-(-)-3-苯基乳酸	Organic acids	有机酸	Organic acids	有机酸	20312-36-1	B	189000	203000	178000	176000	161000	181000	57300	57300	56200	131000	120000	120000	134000	150000	148000	166000	--	--
mws0567	146.09	1.27	145.076	C5H11N3O2	[M+H]+	4-Guanidinobutyric acid	4-胍基丁酸	Organic acids	有机酸	Organic acids	有机酸	463-00-3	B	621000	620000	616000	907000	1210000	809000	396000	432000	686000	494000	372000	332000	629000	688000	694000	689000	C01035	ko00330,ko01100
mws0572	126.1	1.63	125.052	C5H7N3O	[M+H]+	5-Methylcytosine	5-甲基胞嘧啶	Nucleotides and derivatives	核苷酸及其衍生物	Nucleotides and derivatives	核苷酸及其衍生物	554-01-8	B	92000	90500	94600	72000	70400	61700	49700	42100	39700	74100	68400	59200	75100	76400	75200	74700	C02376	ko00240,ko01100
mws0574	103.05	2.05	104.041	C4H8O3	[M-H]-	α-Hydroxyisobutyric acid	α-羟基异丁酸	Organic acids	有机酸	Organic acids	有机酸	594-61-6	B	34000	37000	37200	36800	29900	34600	57800	53200	62300	30900	31200	51000	39000	39500	45400	34500	--	--
mws0576	103.05	1.89	104.041	C4H8O3	[M-H]-	3-Hydroxybutyrate	3-羟基丁酸	Organic acids	有机酸	Organic acids	有机酸	300-85-6	B	145000	117000	133000	113000	122000	100000	62500	62700	62000	126000	106000	142000	93500	94900	95800	92800	--	--
mws0609	344.2	1.87	345.033	C10H12N5O7P	[M-H]-	Guanosine 3',5'-cyclic monophosphate	鸟苷 3',5'-环单磷酸	Nucleotides and derivatives	核苷酸及其衍生物	Nucleotides and derivatives	核苷酸及其衍生物	7665-99-8	B	5480000	5710000	5930000	17700000	16600000	21200000	7620000	10400000	10600000	8750000	8480000	8760000	11700000	11400000	12400000	11400000	C00942	ko00230,ko01100
mws0628	121.04	4.19	122.032	C7H6O2	[M-H]-	4-Hydroxybenzaldehyde	4-羟基苯甲醛	Phenolic acids	酚酸类	Phenolic acids	酚酸类	123-08-0	B	1490000	1420000	1430000	1350000	1430000	1520000	1850000	1930000	1760000	1530000	1570000	1620000	1450000	1320000	1450000	1410000	C00633	ko01100
mws0639	153.2	3.14	154.021	C7H6O4	[M-H]-	2,3-Dihydroxybenzoic Acid	2,3-二羟基苯甲酸	Organic acids	有机酸	Organic acids	有机酸	303-38-8	B	3970000	4110000	3990000	5090000	5490000	5530000	4040000	4570000	3710000	4300000	3610000	4250000	5140000	4930000	4810000	4950000	C00196	ko01110
mws0663	181.1	2.92	180.056	C7H8N4O2	[M+H]+	1,7-Dimethylxanthine	1,7-二甲基黄嘌呤	Nucleotides and derivatives	核苷酸及其衍生物	Nucleotides and derivatives	核苷酸及其衍生物	611-59-6	B	307000	314000	269000	446000	287000	374000	249000	260000	264000	392000	406000	358000	289000	372000	359000	341000	C13747	ko00232,ko01100,ko01110
mws0668	283	2.27	284.063	C10H12N4O6	[M-H]-	Xanthosine	黄苷	Nucleotides and derivatives	核苷酸及其衍生物	Nucleotides and derivatives	核苷酸及其衍生物	146-80-5	B	455000	375000	384000	464000	579000	509000	986000	1160000	1200000	761000	911000	747000	598000	594000	601000	623000	C01762	ko00230,ko00232,ko01100,ko01110,ko02010
mws0704	140	1.21	141.011	C2H8NO4P	[M-H]-	O-Phosphorylethanolamine	邻磷酰乙醇胺	Others	其它类	Others	其它	1071-23-4	B	289000	267000	279000	154000	144000	159000	115000	130000	118000	88400	107000	88700	156000	149000	151000	150000	--	--
mws0712	130.1	1.78	131.05	C5H9NO3	[M-H]-	N-Propionylglycine	N-丙酰甘氨酸	Amino acids and derivatives	氨基酸及其衍生物	Amino acids and derivatives	氨基酸及其衍生物	21709-90-0	B	57600	71300	71500	58400	36000	59300	53200	59700	52700	52900	46100	44800	59400	53300	56900	56900	--	--
mws0748	353.1	2.71	354.079	C16H18O9	[M-H]-	1-Caffeoylquinic acid	1-咖啡酰奎宁酸	Phenolic acids	酚酸类	Phenolic acids	酚酸类	1241-87-8	B	15200000	14600000	12700000	17900000	28500000	16300000	12900000	19300000	12800000	11200000	17100000	7480000	15600000	21500000	15900000	13000000	--	--
mws0749	137.03	3.55	138.026	C7H6O3	[M-H]-	4-Hydroxybenzoic acid	对羟基苯甲酸	Phenolic acids	酚酸类	Phenolic acids	酚酸类	99-96-7	A	369000	340000	345000	471000	524000	432000	293000	295000	283000	391000	330000	331000	353000	347000	350000	348000	C00156	ko00130,ko00790,ko01100,ko01110
mws0752	185.16	8.14	186.147	C11H22O2	[M-H]-	Undecylic Acid	十一烷酸	Lipids	脂质	Free fatty acids	游离脂肪酸	112-37-8	A	990000	611000	695000	661000	768000	761000	827000	1130000	916000	723000	678000	752000	768000	772000	948000	788000	--	--
mws0813	128	1.74	129.036	C5H7NO3	[M-H]-	5-Oxoproline	5-氧化脯氨酸	Amino acids and derivatives	氨基酸及其衍生物	Amino acids and derivatives	氨基酸及其衍生物	149-87-1	A	11800	10900	13800	16300	13100	14200	10600	11800	10000	14100	13200	11600	13100	10900	12200	10500	C01879	ko00480,ko01100
mws0836	577.3	3.16	578.12	C30H26O12	[M-H]-	Procyanidin B1	原花青素 B1	Tannins	鞣质	Proanthocyanidins	原花青素	20315-25-7	A	666000	618000	624000	573000	562000	537000	974000	925000	1040000	510000	627000	573000	635000	661000	644000	639000	--	--
mws0847	150	1.53	149.063	C6H7N5	[M+H]+	1-Methyladenine	1-甲基腺嘌呤	Nucleotides and derivatives	核苷酸及其衍生物	Nucleotides and derivatives	核苷酸及其衍生物	5142-22-3	B	158000	134000	139000	113000	103000	118000	120000	136000	153000	118000	84500	99500	114000	139000	150000	155000	C02216	--
mws0851	143.11	7.49	166.086	C8H15NaO2	[M-Na]-	Sodium Valproate	丙戊酸钠	Organic acids	有机酸	Organic acids	有机酸	1069-66-5	B	2750000	2400000	2400000	2850000	2760000	2690000	3120000	3600000	3100000	2670000	2700000	2740000	2960000	3020000	2890000	2890000	--	--
mws0856	463	4.3	464.076	C21H20O12	[M-H]-	Spiraeoside	绣线菊甙	Flavonoids	黄酮	Flavonols	黄酮醇	20229-56-5	A	1570000	1520000	1460000	2280000	2860000	2280000	3350000	2970000	5530000	2090000	2780000	2590000	2450000	1980000	2270000	1970000	--	--
mws0866	259	1.19	260.016	C6H13O9P	[M-H]-	D-Glucose 6-phosphate	D-葡萄糖-6-磷酸	Others	其它类	Saccharides and Alcohols	糖及醇类	56-73-5	A	2340000	2330000	2390000	1520000	1640000	1710000	2440000	1860000	2100000	2360000	2140000	2040000	1920000	1730000	1950000	1870000	C00092	ko00500,ko00562,ko00998,ko01100
mws0874	346.1	1.33	347.047	C10H14N5O7P	[M-H]-	3'-Aenylic acid	腺苷-3'-磷酸	Nucleotides and derivatives	核苷酸及其衍生物	Nucleotides and derivatives	核苷酸及其衍生物	84-21-9	B	37700	33800	46500	40600	42600	54900	22000	33500	35200	30000	24900	36800	41500	38300	30100	41000	C01367	ko00230,ko01100
mws0884	328.1	2.34	329.038	C10H12N5O6P	[M-H]-	Cyclic AMP	腺苷-3'-5'-环单磷酸水合物	Nucleotides and derivatives	核苷酸及其衍生物	Nucleotides and derivatives	核苷酸及其衍生物	60-92-4	A	105000	93300	87700	243000	264000	280000	134000	159000	205000	156000	166000	147000	175000	163000	187000	185000	C00575	ko00230,ko01100
mws0890	104.03	1.26	105.036	C3H7NO3	[M-H]-	D-Serine	D-丝氨酸	Amino acids and derivatives	氨基酸及其衍生物	Amino acids and derivatives	氨基酸及其衍生物	312-84-5	B	12800	17400	17400	16300	18100	17100	23800	26600	21400	18700	17200	14200	21000	20600	20900	19300	--	--
mws0906	341	3.22	342.113	C16H22O8	[M-H]-	Coniferin	松柏苷	Phenolic acids	酚酸类	Phenolic acids	酚酸类	531-29-3	B	3160000	4080000	3730000	2460000	2560000	2470000	1990000	1440000	1860000	2840000	3380000	2980000	2690000	2690000	2800000	2540000	C00761	ko00940
mws0913	447	4.49	448.082	C21H20O11	[M-H]-	Trifolin	三叶豆甙	Flavonoids	黄酮	Flavonols	黄酮醇	23627-87-4	B	12700000	11200000	11200000	12000000	13500000	14000000	14700000	12200000	16500000	17300000	14100000	15400000	13900000	12400000	12900000	13000000	C12626	ko00944
mws0914	271	5.95	272.058	C15H12O5	[M-H]-	Pinobanksin	短叶松素	Flavonoids	黄酮	Dihydroflavonol	二氢黄酮醇	548-82-3	B	1680000	1450000	1720000	2090000	1900000	2600000	2740000	2930000	3200000	1590000	1310000	1350000	2020000	2050000	1900000	2090000	C09826	ko00941
mws0919	431	4.95	432.088	C21H20O10	[M-H]-	Kaempferin	番泻叶山奈苷	Flavonoids	黄酮	Flavonols	黄酮醇	482-39-3	A	923000	337000	313000	2420000	368000	987000	98200	96700	142000	2210000	661000	324000	1160000	1020000	1010000	1080000	C16911	ko00944
mws0920	301	4.88	302.033	C15H10O7	[M-H]-	Tricetin	五羟黄酮	Flavonoids	黄酮	Flavonoid	黄酮	520-31-0	B	1130000	1230000	890000	1560000	1800000	1390000	1130000	1050000	1020000	1250000	1230000	1230000	1330000	1200000	1410000	1180000	C10192	ko00941
mws0921	149	4	150.061	C9H10O2	[M-H]-	p-Coumaryl alcohol	对-香豆醇	Phenolic acids	酚酸类	Phenolic acids	酚酸类	3690-05-9	B	36400	25100	34400	31100	31000	48300	109000	122000	102000	49800	52900	38200	48400	47200	41700	42100	C02646	ko00940,ko01100,ko01110
mws0924	145.06	3.13	146.049	C6H10O4	[M-H]-	2-Methylglutaric acid	2-甲基戊二酸	Organic acids	有机酸	Organic acids	有机酸	617-62-9	B	429000	420000	440000	501000	666000	538000	561000	744000	551000	616000	634000	586000	539000	500000	530000	507000	--	--
mws0939	211	3.45	210.065	C8H10N4O3	[M+H]+	1,3,7-Trimethyluric acid	1,3,7-三甲基尿酸	Organic acids	有机酸	Organic acids	有机酸	5415-44-1	B	16200	17300	16600	25700	16000	22400	22100	20700	24900	14500	14600	26100	18800	24900	22500	20700	--	--
mws0972	131.08	3.13	132.07	C6H12O3	[M-H]-	5-Hydroxyhexanoic acid	5-羟基己酸	Organic acids	有机酸	Organic acids	有机酸	185956-02-9	B	33200	40900	36400	60800	74500	71100	78700	68100	74100	77000	72000	68300	63800	62200	59600	65400	--	--
mws0983	326.31	9.8	325.272	C20H39NO2	[M+H]+	N-Oleoylethanolamine	油酰单乙醇胺	Others	其它类	Others	其它	111-58-0	B	39800	30700	33800	61700	68800	58900	46900	41000	41900	34200	38400	31300	33700	49900	40200	39100	--	--
mws1012	147.1	5.6	146.032	C9H6O2	[M+H]+	Coumarin	香豆素	Lignans and Coumarins	木脂素和香豆素	Coumarins	香豆素	91-64-5	A	8630	4910	5120	16500	21600	12500	13600	19700	14700	8530	7710	8060	12100	14100	12400	10600	C05851	ko00940,ko01110
mws1013	177	3.69	178.021	C9H6O4	[M-H]-	Esculetin	秦皮乙素	Lignans and Coumarins	木脂素和香豆素	Coumarins	香豆素	305-01-1	B	22200	34000	23700	91300	101000	81700	113000	86900	93500	83200	82300	84900	68000	56300	67400	72000	C09263	--
mws1014	209.2	4.07	208.029	C10H8O5	[M+H]+	Fraxetin	秦皮素	Lignans and Coumarins	木脂素和香豆素	Coumarins	香豆素	574-84-5	B	206000	230000	186000	247000	225000	190000	123000	166000	119000	123000	111000	131000	157000	214000	221000	207000	C09265	--
mws1015	339.1	3.21	340.065	C15H16O9	[M-H]-	Esculin(6,7-DihydroxyCoumarin-6-glucoside)	秦皮甲素	Lignans and Coumarins	木脂素和香豆素	Coumarins	香豆素	531-75-9	B	384000	341000	268000	499000	501000	453000	490000	410000	479000	504000	626000	692000	486000	514000	398000	453000	C09264	--
mws1048	449.1	3.18	448.082	C21H20O11	[M+H]+	Cyanidin 3-O-galactoside	矢车菊素半乳糖苷	Flavonoids	黄酮	Anthocyanins	花青素	27661-36-5	A	684000	811000	807000	2710000	1600000	1140000	3680000	2830000	3130000	2150000	2630000	1470000	1630000	1810000	1790000	1660000	C08647	--
mws1068	285.05	6.18	286.038	C15H10O6	[M-H]-	Kaempferol	山奈酚	Flavonoids	黄酮	Flavonols	黄酮醇	520-18-3	A	528000	513000	566000	619000	640000	636000	243000	240000	274000	371000	280000	226000	472000	424000	437000	423000	C05903	ko00941,ko00944,ko01100,ko01110
mws1073	595.2	3.68	594.132	C27H30O15	[M+H]+	Apigenin 6,8-C-diglucoside	芹菜素-6,8-C-二葡萄糖苷	Flavonoids	黄酮	Flavonoid	黄酮	23666-13-9	B	434000	416000	398000	947000	1560000	1130000	480000	256000	438000	884000	858000	926000	608000	611000	937000	605000	--	--
mws1075	177.05	6.13	176.041	C10H8O3	[M+H]+	7-Methoxycoumarin	7-甲氧基香豆素	Lignans and Coumarins	木脂素和香豆素	Coumarins	香豆素	531-59-9	B	290000	353000	341000	561000	342000	220000	17400	19900	5810	12300	12100	9770	184000	263000	227000	209000	C09268	--
mws1080	341.1	1.25	342.096	C12H22O11	[M-H]-	Galactinol	肌醇半乳糖苷	Others	其它类	Saccharides and Alcohols	糖及醇类	3687-64-7	B	6620000	5210000	5630000	10100000	9500000	9990000	10400000	9750000	7680000	14000000	11700000	10600000	10300000	8410000	9600000	9500000	--	--
mws1090	259	1.28	260.016	C6H13O9P	[M-H]-	Glucose-1-phosphate	葡萄糖-1-磷酸	Others	其它类	Saccharides and Alcohols	糖及醇类	59-56-3	A	2250000	2550000	2490000	1580000	1700000	1660000	2320000	1830000	2280000	2400000	2400000	1860000	1880000	1850000	1770000	2000000	--	--
mws1138	551.16	4.29	550.119	C24H26N2O13	[M+H]+	Batanin	甜菜苷	Alkaloids	生物碱	Alkaloids	生物碱	7659-95-2	B	832000	1700000	1090000	1110000	956000	1260000	1260000	1270000	951000	900000	991000	768000	889000	1340000	1480000	1100000	--	--
mws1140	271.07	6.16	272.058	C15H12O5	[M-H]-	Naringenin chalcone(4,2',4',6'-Tetrahydroxychalcone)	4,2',4',6'-四羟基查尔酮	Flavonoids	黄酮	Chalcones	查耳酮	73692-50-9	A	2070000	1760000	2160000	2570000	2350000	3170000	3570000	3810000	3910000	1930000	1600000	1720000	2470000	2430000	2470000	2390000	C06561	ko00941,ko01100,ko01110
mws1173	271	4.85	272.058	C15H12O5	[M-H]-	Garbanzol	3,4',7-三羟基黄烷酮	Flavonoids	黄酮	Flavonols	黄酮醇	1226-22-8	B	110000	136000	97200	174000	87800	106000	92700	64100	88500	34500	58300	69700	86000	74700	91100	85200	C09751	ko00941
mws1189	193.1	1.26	194.033	C6H10O7	[M-H]-	D-Galacturonic acid(Gal A)	α-D-半乳糖醛酸	Organic acids	有机酸	Organic acids	有机酸	91510-62-2	B	61000	52600	65200	59900	55500	61700	55300	52300	59200	67600	66100	64200	53600	62100	56900	45600	C00333	ko00040,ko00053,ko00520,ko01100,ko02010
mws1195	179.1	5.98	178.055	C10H10O3	[M+H]+	Methyl p-coumarate	对香豆酸甲酯	Phenolic acids	酚酸类	Phenolic acids	酚酸类	3943-97-3	A	518000	590000	680000	419000	446000	581000	861000	853000	1250000	888000	600000	521000	676000	865000	830000	938000	--	--
mws1200	177	6.03	178.055	C10H10O3	[M-H]-	Trans-4-Hydroxycinnamic Acid Methyl Ester	反式-4-羟基肉桂酸甲酯	Phenolic acids	酚酸类	Phenolic acids	酚酸类	19367-38-5	A	1330000	1380000	1790000	859000	993000	1270000	2450000	2200000	3420000	2110000	1500000	1340000	1820000	1680000	1830000	1720000	--	--
mws1290	593.14	5.42	594.114	C30H26O13	[M-H]-	Tiliroside	银锻苷	Flavonoids	黄酮	Flavonols	黄酮醇	20316-62-5	A	15500000	19500000	16500000	12000000	18200000	14100000	12400000	11800000	15000000	15700000	18000000	16000000	14400000	12900000	14000000	12700000	C17140	--
mws1292	565.2	4.02	564.123	C26H28O14	[M+H]+	Isoschaftoside	异夏佛塔苷	Flavonoids	黄酮	Flavonoid carbonoside	黄酮碳糖苷	52012-29-0	B	2720000	1940000	1810000	4910000	6470000	4280000	2350000	1950000	2820000	3450000	4040000	3720000	3780000	3270000	3590000	3400000	--	--
mws1293	565.13	5.18	564.105	C29H24O12	[M+H]+	Theaflavin	茶黄素(TF1)	Tannins	鞣质	Proanthocyanidins	原花青素	4670-05-7	A	512000	543000	600000	1280000	1340000	973000	1090000	924000	855000	778000	781000	776000	871000	828000	894000	931000	--	--
mws1294	717.14	5.29	716.112	C36H28O16	[M+H]+	Theaflavin-3-gallate	茶黄素-3-没食子酸酯(TF-3-G)	Tannins	鞣质	Proanthocyanidins	原花青素	30462-34-1	B	323000	332000	326000	523000	794000	632000	754000	625000	607000	521000	434000	522000	450000	621000	473000	582000	--	--
mws1295	717.14	5.3	716.112	C36H28O16	[M+H]+	Theaflavin-3'-Gallate	茶黄素-3'-没食子酸酯(TF-3'-G)	Tannins	鞣质	Proanthocyanidins	原花青素	28543-07-9	A	242000	250000	289000	532000	487000	509000	445000	451000	391000	358000	389000	357000	406000	465000	410000	409000	--	--
mws1296	867.16	5.31	868.118	C43H32O20	[M-H]-	Theaflavin 3,3'-Digallate	茶黄素-3,3'-双没食子酸(TFBG)	Tannins	鞣质	Proanthocyanidins	原花青素	30462-35-2	A	1850000	2450000	2180000	2410000	2460000	2980000	2360000	2510000	1590000	2630000	1680000	1860000	2540000	2670000	2610000	2140000	--	--
mws1299	449.1	3.96	448.082	C21H20O11	[M+H]+	Orientin	荭草苷	Flavonoids	黄酮	Flavonoid carbonoside	黄酮碳糖苷	28608-75-5	A	481000	408000	345000	725000	973000	726000	448000	214000	341000	306000	843000	723000	447000	710000	596000	473000	C10114	--
mws1329	463.09	4.5	464.076	C21H20O12	[M-H]-	Gossypitrin	槲皮素-7-O-葡萄糖苷	Flavonoids	黄酮	Flavonols	黄酮醇	491-50-9	A	1830000	1290000	1470000	2240000	2740000	2320000	3310000	3150000	5510000	1990000	2630000	2800000	2040000	2500000	2130000	1830000	--	--
mws1333	341.12	1.23	342.096	C12H22O11	[M-H]-	Melibiose	蜜二糖	Others	其它类	Saccharides and Alcohols	糖及醇类	585-99-9	B	735000	625000	824000	1180000	1090000	950000	1200000	1280000	1010000	1440000	1170000	1240000	1100000	1170000	1140000	1270000	C05402	ko00052,ko01100,ko02010
mws1337	220.2	2.78	219.097	C9H17NO5	[M+H]+	D-Pantothenic Acid	D-泛酸	Others	其它类	Vitamin	维生素	79-83-4	A	2200000	2110000	2090000	2660000	2320000	2260000	2080000	1860000	1920000	2100000	2170000	2240000	2370000	2610000	2420000	2500000	C00864	ko00410,ko00770,ko01100,ko01110
mws1354	193.06	4.59	194.049	C10H10O4	[M-H]-	Trans-ferulic acid	反式-阿魏酸	Phenolic acids	酚酸类	Phenolic acids	酚酸类	537-98-4	B	188000	216000	204000	352000	422000	327000	199000	204000	178000	180000	201000	218000	269000	248000	255000	251000	--	--
mws1397	441.3	4.33	442.073	C22H18O10	[M-H]-	(-)-Epicatechin gallate	(-)-表儿茶素没食子酸酯	Flavonoids	黄酮	Flavanols	黄烷醇类	1257-08-5	B	111000000	108000000	110000000	100000000	99900000	97700000	108000000	102000000	98800000	113000000	108000000	99300000	104000000	107000000	103000000	96300000	--	--
mws1401	175	1.63	174.089	C7H14N2O3	[M+H]+	L-theanine	L-茶氨酸	Amino acids and derivatives	氨基酸及其衍生物	Amino acids and derivatives	氨基酸及其衍生物	3081-61-6	A	1100000	1060000	1110000	1130000	1080000	1030000	1150000	1020000	1160000	1200000	1170000	1180000	1150000	963000	1120000	1050000	C01047	--
mws1417	160	4.89	161.042	C9H7NO2	[M-H]-	Indole-3-carboxylic acid	3-吲哚甲酸	Alkaloids	生物碱	Plumerane	吲哚类生物碱	771-50-6	B	59900	75200	55800	76000	60900	80900	65400	71500	58200	66800	53000	66900	72900	59300	69800	65600	--	--
mws1422	275.1	4.24	274.073	C15H14O5	[M+H]+	(-)-Epiafzelechin	(-)-表阿夫儿茶精	Flavonoids	黄酮	Flavanols	黄烷醇类	24808-04-6	A	2360000	2030000	2360000	3090000	3220000	3170000	1980000	1610000	2430000	8750000	3700000	3640000	2590000	3110000	2770000	2880000	C12128	ko00941,ko01110
mws1434	431.11	4.2	432.088	C21H20O10	[M-H]-	Isovitexin	异牡荆素	Flavonoids	黄酮	Flavonoid carbonoside	黄酮碳糖苷	29702-25-8	B	338000	336000	202000	1030000	1380000	596000	285000	221000	452000	513000	823000	632000	511000	413000	400000	462000	C01714	ko00944
mws1489	283.26	10.05	284.248	C18H36O2	[M-H]-	Stearic Acid	硬脂酸	Lipids	脂质	Free fatty acids	游离脂肪酸	57-11-4	B	17900000	13800000	13800000	17700000	21300000	17400000	9990000	11500000	8470000	10600000	9970000	9160000	10300000	16700000	12400000	9220000	--	--
mws1519	595.17	4.2	596.146	C27H32O15	[M-H]-	Eriocitrin	圣草次苷	Flavonoids	黄酮	Dihydroflavone	二氢黄酮	13463-28-0	B	223000	188000	152000	232000	265000	286000	150000	139000	168000	214000	208000	254000	213000	202000	202000	197000	C09732	--
mws1521	285.1	3.15	286.09	C13H18O7	[M-H]-	Salicin	水杨苷	Phenolic acids	酚酸类	Phenolic acids	酚酸类	138-52-3	B	188000	187000	237000	111000	86400	111000	114000	156000	89500	113000	113000	50300	136000	104000	139000	116000	C01451	ko00010
mws1584	515.12	3.63	516.105	C25H24O12	[M-H]-	Cynarin	1,3-O-二咖啡酰奎宁酸	Phenolic acids	酚酸类	Phenolic acids	酚酸类	30964-13-7	B	194000	222000	161000	240000	318000	268000	354000	276000	393000	365000	353000	360000	277000	291000	277000	249000	C10445	--
mws1587	132.1	1.85	131.085	C6H13NO2	[M+H]+	α-Aminocaproic acid	L-正亮氨酸	Amino acids and derivatives	氨基酸及其衍生物	Amino acids and derivatives	氨基酸及其衍生物	327-57-1	A	13400000	15600000	13100000	19500000	17300000	17400000	5380000	5590000	5600000	5960000	4540000	5850000	13600000	14100000	16100000	16700000	--	--
mws1660	565.15	3.84	564.123	C26H28O14	[M+H]+	Schaftoside	夏佛塔苷	Flavonoids	黄酮	Flavonoid carbonoside	黄酮碳糖苷	51938-32-0	A	7140	7190	2000	13000	19900	4960	7900	4960	7290	12100	4220	12700	13500	9900	14300	6400	--	--
mws1661	609.18	4.65	608.146	C28H32O15	[M+H]+	Diosmin	香叶木苷	Flavonoids	黄酮	Flavonoid	黄酮	520-27-4	B	54300	52300	43600	52400	54000	79800	145000	78400	67100	44200	55400	67700	63000	70000	74700	57100	C10039	--
mws2104	193.07	1.24	194.067	C7H14O6	[M-H]-	D-Pinitol	D-松醇	Others	其它类	Others	其它	10284-63-6	B	52300	54000	54700	65800	65500	62900	68300	58500	56200	59400	61000	52500	56700	54400	58900	58000	--	--
mws2108	353.1	3.42	354.079	C16H18O9	[M-H]-	Cryptochlorogenic acid	隐绿原酸	Phenolic acids	酚酸类	Phenolic acids	酚酸类	905-99-7	A	8980000	9460000	7700000	9720000	11200000	10600000	13500000	14200000	14500000	12100000	11200000	11000000	10900000	11000000	10800000	11500000	--	--
mws2118	435.13	4.95	436.116	C21H24O10	[M-H]-	Phloretin 2'-O-glucoside	根皮苷	Flavonoids	黄酮	Isoflavones	异黄酮	60-81-1	B	103000	85900	91400	109000	102000	496000	270000	230000	215000	196000	172000	179000	161000	181000	156000	163000	--	--
mws2120	291	3.52	292.013	C13H8O8	[M-H]-	Brevifolin carboxylic acid	短叶苏木酚酸	Phenolic acids	酚酸类	Phenolic acids	酚酸类	18490-95-4	B	4560000	5840000	7310000	3650000	4630000	4640000	2080000	2490000	1810000	1950000	2080000	1780000	3690000	3420000	3680000	3640000	--	--
mws2209	447.1	4.66	448.082	C21H20O11	[M-H]-	Astragalin	紫云英苷	Flavonoids	黄酮	Flavonols	黄酮醇	480-10-4	A	15700000	12800000	12200000	15700000	16500000	14700000	15600000	13900000	18100000	20300000	15000000	15400000	15200000	14000000	15600000	15400000	--	--
mws2212	179.04	3.64	180.035	C9H8O4	[M-H]-	Caffeic acid	咖啡酸	Phenolic acids	酚酸类	Phenolic acids	酚酸类	331-39-5	A	215000	211000	221000	429000	547000	489000	498000	689000	561000	347000	331000	371000	385000	413000	368000	362000	C01197	ko00940,ko01100,ko01110
mws2213	147.05	5.72	148.046	C9H8O2	[M-H]-	Cinnamic acid	肉桂酸	Phenolic acids	酚酸类	Phenolic acids	酚酸类	140-10-3	B	105000	115000	110000	114000	116000	120000	232000	278000	248000	162000	137000	139000	152000	141000	155000	147000	C00423	ko00130,ko00360,ko00940,ko00999,ko01100,ko01110
mws2218	195.08	3.64	194.071	C8H10N4O2	[M+H]+	Caffeine	咖啡碱	Alkaloids	生物碱	Alkaloids	生物碱	58-08-2	A	3230000	2940000	3080000	3400000	3000000	3170000	2700000	2810000	2710000	2980000	2960000	2930000	3130000	3590000	3240000	3300000	C07481	ko00232,ko01100,ko01110
mws2220	457.08	3.97	458.068	C22H18O11	[M-H]-	Gallocatechin 3-O-gallate	没食子儿茶素没食子酸酯	Flavonoids	黄酮	Flavanols	黄烷醇类	5127-64-0	A	4720000	5270000	5300000	4720000	4520000	3810000	4150000	3880000	3910000	4210000	5290000	4030000	4800000	4370000	4420000	4270000	--	--
mws2221	441.08	4.44	442.073	C22H18O10	[M-H]-	Catechin gallate	儿茶素没食子酸酯	Flavonoids	黄酮	Flavanols	黄烷醇类	130405-40-2	A	1680000	1790000	1620000	1580000	1560000	1570000	1680000	1570000	1330000	1590000	1640000	1610000	1660000	1480000	1650000	1660000	--	--
mws2368	137.07	3.55	138.061	C8H10O2	[M-H]-	Tyrosol	酪醇	Phenolic acids	酚酸类	Phenolic acids	酚酸类	501-94-0	B	27000	24100	20200	30100	26800	32200	47200	44600	46000	35800	30400	32500	33500	30700	30300	33000	--	--
mws2625	359.15	6.33	358.125	C20H22O6	[M+H]+	Matairesinol	罗汉松脂素	Lignans and Coumarins	木脂素和香豆素	Lignans	木脂素	580-72-3	B	122000	140000	165000	175000	108000	164000	179000	174000	159000	133000	138000	138000	135000	177000	169000	161000	--	--
mws4053	455.36	8.21	456.329	C30H48O3	[M-H]-	Ursolic acid	熊果酸	Terpenoids	萜类	Triterpene	三萜	77-52-1	B	59000	110000	112000	42400	16600	23100	36800	16700	25200	7300	16800	32200	45900	63800	51500	48200	C08988	--
mws4108	353.2	6.99	352.116	C21H20O5	[M+H]+	1-Methoxyphaseollin	1-甲氧基香豆素	Others	其它类	Others	其它	157226-48-7	B	17900	17000	17000	23500	28900	18000	13800	16800	16700	10500	13700	10900	19600	22600	18200	19900	--	--
mws4134	611.15	1.75	612.121	C20H32N6O12S2	[M-H]-	Oxidized Glutathione	谷胱甘肽	Amino acids and derivatives	氨基酸及其衍生物	Amino acids and derivatives	氨基酸及其衍生物	121-24-4	B	182000	221000	222000	106000	117000	81700	146000	182000	180000	212000	263000	195000	142000	136000	156000	134000	--	--
mws4170	179.06	1.32	180.053	C6H12O6	[M-H]-	D-Glucose	D-葡萄糖	Others	其它类	Saccharides and Alcohols	糖及醇类	14431-43-7	B	693000	692000	716000	1180000	965000	1210000	1330000	1250000	962000	1510000	1070000	1370000	1210000	1070000	1110000	1110000	--	--
mws4183	433.08	4.68	434.068	C20H18O11	[M-H]-	Quercetin-3-O-α-L-arabinopyranoside(guaijaverin)	槲皮素-3-O-α-L-吡喃阿拉伯糖苷	Flavonoids	黄酮	Flavonols	黄酮醇	22255-13-6	A	6270000	4930000	4050000	5780000	5320000	4790000	8380000	5420000	8690000	4230000	7950000	5340000	5700000	5420000	5850000	5970000	--	--
mws5038	341.11	1.32	342.096	C12H22O11	[M-H]-	Isomaltulose	异麦芽酮糖	Others	其它类	Saccharides and Alcohols	糖及醇类	13718-94-0	B	840000	1000000	841000	1330000	1280000	1310000	1320000	1450000	1310000	2060000	1640000	1490000	1670000	1510000	1730000	1640000	--	--
mws5039	341.09	3.33	340.065	C15H16O9	[M+H]+	Esculin Hydrate	七叶苷	Lignans and Coumarins	木脂素和香豆素	Coumarins	香豆素	66778-17-4	A	202000	168000	203000	287000	263000	226000	319000	207000	256000	351000	427000	354000	257000	320000	273000	266000	--	--
mws5040	365.11	1.36	364.078	C12H21O11Na	[M+H]+	Turanose	松二糖	Others	其它类	Saccharides and Alcohols	糖及醇类	547-25-1	A	15400	11000	6750	25400	21100	20400	258000	262000	290000	197000	238000	410000	86700	120000	80300	119000	--	--
mws5042	223.11	2.76	222.089	C11H14N2O3	[M+H]+	Glycylphenylalanine	氨基乙酰基苯丙氨酸	Amino acids and derivatives	氨基酸及其衍生物	Amino acids and derivatives	氨基酸及其衍生物	721-66-4	A	665000	611000	660000	1140000	1070000	1190000	524000	681000	616000	679000	503000	476000	702000	904000	974000	965000	--	--
mws5045	215.17	7.03	216.156	C12H24O3	[M-H]-	12-Hydroxydodecanoic acid	12-羟基十二酸	Lipids	脂质	Free fatty acids	游离脂肪酸	505-95-3	A	10000	10200	9170	13900	14000	12500	12000	11700	11900	10400	9880	10300	10300	12100	10800	10900	--	--
pmb0149	351	7.12	350.222	C21H34O4	[M+H]+	MAG(18:4)isomer1	单酰甘油酯(酰基 18:4)异构1	Lipids	脂质	Glycerol ester	甘油酯	-	B	228000	218000	226000	148000	194000	161000	88900	111000	94200	90700	75600	81800	143000	171000	164000	136000	--	--
pmb0160	353.3	6.53	352.237	C21H36O4	[M+H]+	MAG(18:3)isomer5	单酰甘油酯(酰基 18:3)异构5	Lipids	脂质	Glycerol ester	甘油酯	-	B	485000	424000	663000	1100000	1180000	920000	884000	914000	926000	902000	888000	724000	773000	837000	895000	687000	--	--
pmb0168	700.1	8.28	699.435	C38H70NO8P	[M+H]+	PC 16:1/14:1	磷脂酰胆碱 16:1/14:1	Lipids	脂质	PC	磷脂酰胆碱	-	B	3570000	3730000	3360000	2150000	1650000	2200000	1520000	1650000	1590000	1320000	1390000	1390000	1920000	2720000	2220000	1990000	--	--
pmb0287	351.4	6.21	350.222	C21H34O4	[M+H]+	MAG(18:4)isomer2	单酰甘油酯(酰基 18:4)异构2	Lipids	脂质	Glycerol ester	甘油酯	-	A	74100	71200	73700	65300	36800	56100	44200	33400	33800	80000	92200	75300	61800	63400	59500	60100	--	--
pmb0296	357.2	7.8	356.265	C21H40O4	[M+H]+	MAG(18:1)isomer2	单酰甘油酯(酰基 18:2)异构2	Lipids	脂质	Glycerol ester	甘油酯	-	B	156000	135000	144000	204000	292000	176000	150000	168000	139000	93100	84200	87200	160000	222000	225000	246000	--	--
pmb0374	136.1	2.39	135.049	C5H5N5	[M+H]+	Aminopurine	氨基嘌呤	Alkaloids	生物碱	Alkaloids	生物碱	452-06-2	A	825000	813000	883000	2100000	2040000	2330000	784000	876000	970000	959000	897000	857000	1280000	1470000	1350000	1270000	--	--
pmb0423	193.1	3.69	194.049	C10H10O4	[M-H]-	Hydroxy-methoxycinnamate	反式-4-羟基-3-甲氧基肉桂酸	Phenolic acids	酚酸类	Phenolic acids	酚酸类	-	B	123000	142000	111000	78400	71300	86900	116000	130000	99600	123000	127000	115000	112000	91300	91700	95400	--	--
pmb0484	104.1	1.24	103.091	C5H13NO	[M+H]+	Choline	胆碱	Alkaloids	生物碱	Alkaloids	生物碱	62-49-7	B	11300000	11500000	9980000	17600000	20000000	17800000	11000000	12300000	10500000	9270000	9120000	8230000	13700000	15300000	14200000	14400000	C00114	ko00260,ko00564,ko01100,ko02010
pmb0492	584.2	2.99	583.268	C34H37N3O6	[M+H]+	N',N'',N'''-p-Coumaroyl-cinnamoyl-caffeoyl spermidine	N',N'',N'''-对香豆酰阿魏酰咖啡酰亚精胺	Alkaloids	生物碱	Phenolamine	酚胺	-	B	357000	294000	313000	285000	245000	215000	279000	292000	278000	424000	474000	370000	313000	379000	353000	429000	--	--
pmb0530	664.2	1.64	663.08	C21H27N7O14P2	[M+H]+	Nicotinic acid adenine dinucleotide	烟酸腺嘌呤二核苷酸	Nucleotides and derivatives	核苷酸及其衍生物	Nucleotides and derivatives	核苷酸及其衍生物	53-84-9	B	82200	87100	97000	113000	83100	80000	44300	43800	55100	49400	57600	56200	74600	75600	64900	92200	C00003	ko00190,ko00730,ko00760,ko01100
pmb0550	449.1	3.06	449.089	C21H21O11	[M]+	Cyanidin 3-O-glucoside(Kuromanin)	矢车菊素 3-O-葡萄糖苷	Flavonoids	黄酮	Anthocyanins	花青素	7084-24-4	B	552000	705000	678000	2210000	1420000	810000	2780000	2480000	2920000	1740000	2150000	1150000	1260000	1350000	1320000	1330000	C08604	ko00942
pmb0622	611.2	3.39	610.126	C27H30O16	[M+H]+	C-Hexosyl-luteolin O-hexoside	C-己糖基木犀草素 O-己糖苷	Flavonoids	黄酮	Flavonoid carbonoside	黄酮碳糖苷	-	B	29800	39100	19400	60700	65600	37100	91800	61700	41200	53000	59600	80700	49600	54000	57800	55700	--	--
pmb0652	565.1	4.05	564.123	C26H28O14	[M+H]+	C-Hexosyl-apigenin O-pentoside	C-己糖基-芹菜素 O-戊糖苷	Flavonoids	黄酮	Flavonoid carbonoside	黄酮碳糖苷	-	B	76100	60700	35800	185000	211000	71600	34700	27000	34200	40200	46800	59700	75100	78900	64000	61500	--	--
pmb0653	595.1	4.14	594.132	C27H30O15	[M+H]+	Di-C,C-hexosyl-apigenin	芹菜素 C,C-二己糖苷	Flavonoids	黄酮	Flavonoid	黄酮	-	B	2020000	2910000	961000	5650000	5510000	2190000	1630000	1200000	1660000	1690000	2310000	3060000	2260000	2830000	2360000	2630000	--	--
pmb0665	611.2	4.17	610.126	C27H30O16	[M+H]+	Luteolin 8-C-hexosyl-O-hexoside	木犀草素 8-C-己糖苷-O-己糖苷	Flavonoids	黄酮	Flavonoid	黄酮	-	B	1960000	1940000	1600000	2360000	2220000	1960000	2170000	1670000	2170000	1620000	2750000	1980000	2130000	2650000	2000000	2310000	--	--
pmb0681	403.1	4.75	402.079	C20H18O9	[M+H]+	Apigenin 8-C-pentoside	芹菜素 8-C-戊糖苷	Flavonoids	黄酮	Flavonoid	黄酮	-	A	260000	217000	114000	352000	542000	333000	250000	144000	184000	492000	392000	381000	209000	358000	276000	298000	--	--
pmb0736	493.1	4.74	492.105	C23H24O12	[M+H]+	Tricin 7-O-hexoside	麦黄酮 7-O-己糖苷	Flavonoids	黄酮	Flavonoid	黄酮	-	A	1260000	939000	1130000	2140000	3550000	2060000	1560000	1150000	1360000	1380000	1960000	1720000	1360000	1830000	2070000	1600000	--	--
pmb0752	369.1	3.49	368.093	C17H20O9	[M+H]+	3-O-Feruloyl quinic acid	3-O-阿魏酰奎宁酸	Phenolic acids	酚酸类	Phenolic acids	酚酸类	1899-29-2	B	136000	217000	180000	297000	445000	246000	166000	189000	162000	168000	242000	222000	270000	294000	255000	249000	C02572	--
pmb0764	144.1	3.12	143.033	C6H9NOS	[M+H]+	4-Methyl-5-thiazoleethanol	4-甲基-5-噻唑乙醇	Others	其它类	Others	其它	137-00-8	B	35200	39000	50000	30900	31700	38600	15200	20800	14500	36000	24300	21700	31900	38500	29400	31300	C04294	ko00730,ko01100
pmb0767	302.4	6.3	301.272	C18H39NO2	[M+H]+	D-erythro-Dihydrosphingosine	D-赤式-二氢鞘氨醇	Lipids	脂质	Sphingolipids	鞘脂	764-22-7	A	64400	78900	72200	56100	64100	72800	95300	73800	87200	72700	69400	60900	71600	83300	70100	76900	C00836	ko00600,ko01100
pmb0854	518.3	6.94	517.282	C26H48NO7P	[M+H]+	LysoPC 18:3	溶血磷脂酰胆碱 18:3	Lipids	脂质	LPC	溶血磷脂酰胆碱	-	A	188000	185000	191000	147000	187000	190000	94200	114000	111000	69400	82100	73400	173000	157000	154000	172000	--	--
pmb0855	496.3	7.74	495.296	C24H50NO7P	[M+H]+	LysoPC 16:0	溶血磷脂酰胆碱 16:0	Lipids	脂质	LPC	溶血磷脂酰胆碱	17364-16-8	A	8550000	9290000	8550000	8410000	8890000	10400000	4580000	4870000	3910000	4300000	3910000	3870000	7370000	9040000	8640000	8450000	--	--
pmb0856	480.31	7.8	479.268	C23H46NO7P	[M+H]+	LysoPE 18:1(2n isomer)	溶血磷脂酰乙醇胺 18:1(2n异构)	Lipids	脂质	LPE	溶血磷脂酰乙醇胺	-	B	1380000	1330000	1470000	2690000	2670000	2230000	2070000	2010000	1920000	1730000	1900000	1620000	1870000	2320000	2240000	2050000	--	--
pmb0863	492.3	6.29	491.268	C24H46NO7P	[M+H]+	LysoPC 16:2(2n isomer)	溶血磷脂酰胆碱 16:2	Lipids	脂质	LPC	溶血磷脂酰胆碱	-	B	148000	153000	164000	199000	200000	252000	140000	178000	161000	127000	114000	99000	163000	213000	191000	184000	--	--
pmb0864	426.3	6.63	425.224	C19H40NO7P	[M+H]+	LysoPE 14:0	溶血磷脂酰乙醇胺 14:0	Lipids	脂质	LPE	溶血磷脂酰乙醇胺	-	B	46700	60400	47100	57700	56800	84700	48100	51800	49500	32400	33900	35600	54000	70500	61500	58600	--	--
pmb0865	518.2	6.67	517.282	C26H48NO7P	[M+H]+	LysoPC 18:3(2n isomer)	溶血磷脂酰胆碱 18:3(2n异构)	Lipids	脂质	LPC	溶血磷脂酰胆碱	-	B	2520000	2540000	2840000	3410000	3690000	3640000	2460000	2660000	2680000	2280000	2490000	2560000	3000000	3330000	3510000	3090000	--	--
pmb0874	478.6	7.32	477.253	C23H44NO7P	[M+H]+	LysoPE 18:2(2n isomer)	溶血磷脂酰乙醇胺 18:2(2n异构)	Lipids	脂质	LPE	溶血磷脂酰乙醇胺	-	A	1960000	1670000	1860000	2020000	2220000	2040000	1320000	1570000	1360000	950000	981000	949000	1690000	2490000	2080000	1830000	--	--
pmb0876	454.2	7.68	453.253	C21H44NO7P	[M+H]+	LysoPE 16:0	溶血磷脂酰乙醇胺 16:0	Lipids	脂质	LPE	溶血磷脂酰乙醇胺	53862-35-4	A	9670000	10800000	10500000	12300000	12600000	14300000	7110000	8080000	6490000	5980000	5820000	5250000	10000000	11800000	11000000	11400000	--	--
pmb0889	279.3	7.91	278.205	C18H30O2	[M+H]+	Punicic acid	石榴酸	Lipids	脂质	Free fatty acids	游离脂肪酸	544-72-9	A	3710000	3540000	3290000	3560000	3780000	3660000	2370000	3420000	2470000	1900000	1650000	1840000	3150000	3500000	3110000	3330000	C08364	--
pmb0890	355.1	9.45	354.251	C21H38O4	[M+H]+	MAG(18:2)	单酰甘油酯(18:2)	Lipids	脂质	Glycerol ester	甘油酯	-	B	458000	411000	465000	688000	589000	688000	648000	724000	735000	836000	821000	736000	560000	805000	691000	677000	--	--
pmb0981	348.2	1.64	347.047	C10H14N5O7P	[M+H]+	Adenosine 5'-monophosphate	腺苷 5'-单磷酸	Nucleotides and derivatives	核苷酸及其衍生物	Nucleotides and derivatives	核苷酸及其衍生物	61-19-8	A	842000	1390000	1180000	2070000	1180000	2030000	1250000	566000	1030000	1430000	839000	1010000	2040000	1540000	1450000	1480000	C00020	ko00230,ko00908,ko01100,ko01110
pmb1096	118	2.97	117.053	C8H7N	[M+H]+	Indole	吲哚	Alkaloids	生物碱	Plumerane	吲哚类生物碱	120-72-9	B	846000	783000	784000	914000	1000000	945000	443000	545000	416000	523000	359000	466000	709000	809000	750000	668000	C00463	ko00380,ko00400,ko00402,ko01100,ko01110
pmb1562	351	6.75	350.222	C21H34O4	[M+H]+	MAG(18:4)isomer3	单酰甘油酯(酰基 18:4)异构3	Lipids	脂质	Glycerol ester	甘油酯	-	B	329000	347000	312000	160000	168000	191000	123000	156000	145000	144000	127000	117000	188000	212000	180000	195000	--	--
pmb1587	207.2	7.33	206.118	C13H18O2	[M+H]+	4-Hydroxy-3,5-diisopropylbenzaldehyde	4-羟基-3,5-二异丙基苯甲醛	Phenolic acids	酚酸类	Phenolic acids	酚酸类	10537-86-7	B	63400	60000	53600	93800	113000	74700	58800	56000	57800	91200	71300	85700	69200	70600	60800	64400	--	--
pmb1605	353.3	7.55	352.237	C21H36O4	[M+H]+	MAG(18:3)isomer3	单酰甘油酯(酰基 18:3)异构3	Lipids	脂质	Glycerol ester	甘油酯	-	A	4060000	3930000	3750000	6650000	5460000	4370000	4110000	3920000	4310000	2730000	2720000	3000000	4920000	6790000	5150000	6740000	--	--
pmb1656	353.1	8.85	352.237	C21H36O4	[M+H]+	MAG(18:3)isomer4	单酰甘油酯(酰基 18:3)异构4	Lipids	脂质	Glycerol ester	甘油酯	-	B	30200	25900	29500	49500	40300	52600	42200	47300	52200	55800	50100	44500	40700	47800	42700	44800	--	--
pmb2211	343.1	7.03	342.262	C19H38N2O3	[M+H]+	Cocamidopropyl βine	椰油酰胺丙基甜菜碱	Alkaloids	生物碱	Alkaloids	生物碱	4292-10-8	A	8940	4040	5570	6790	7270	8300	12100	14300	16900	6990	7220	7550	8670	9150	8170	7830	--	--
pmb2260	480.31	6.66	479.268	C23H46NO7P	[M+H]+	LysoPC 15:1	溶血磷脂酰胆碱 15:1	Lipids	脂质	LPC	溶血磷脂酰胆碱	-	B	20600	19500	20100	25700	36400	36200	20400	21000	15300	13800	13100	13900	26500	30400	24500	29500	--	--
pmb2319	482.3	7.2	481.282	C23H48NO7P	[M+H]+	LysoPC 15:0	溶血磷脂酰胆碱 15:0	Lipids	脂质	LPC	溶血磷脂酰胆碱	-	B	228000	287000	247000	252000	272000	271000	108000	124000	92300	109000	89900	107000	228000	246000	247000	227000	--	--
pmb2363	357.2	7.69	356.265	C21H40O4	[M+H]+	MAG(18:1)isomer1	单酰甘油酯(酰基 18:1)异构1	Lipids	脂质	Glycerol ester	甘油酯	-	B	49000	48600	47900	104000	108000	79700	69300	67600	64100	93600	97600	91600	78700	95400	86400	77000	--	--
pmb2406	510.1	8.29	509.311	C25H52NO7P	[M+H]+	LysoPC 17:0	溶血磷脂酰胆碱 17:0	Lipids	脂质	LPC	溶血磷脂酰胆碱	-	A	155000	178000	151000	153000	145000	164000	57700	58300	44200	57500	55600	50400	118000	166000	137000	143000	--	--
pmb2444	353.2	9	352.237	C21H36O4	[M+H]+	MAG(18:3)isomer1	单酰甘油酯(酰基 18:3)异构1	Lipids	脂质	Glycerol ester	甘油酯	-	A	4020000	3780000	4490000	4590000	5240000	5490000	3600000	5280000	4120000	3510000	3600000	2930000	4200000	6420000	5090000	5050000	--	--
pmb2591	245	4.33	246.089	C13H14N2O3	[M-H]-	Acetyltryptophan	乙酰色氨酸	Amino acids and derivatives	氨基酸及其衍生物	Amino acids and derivatives	氨基酸及其衍生物	2280-01-5	B	3370000	3730000	2980000	2660000	3610000	2900000	3560000	4300000	4120000	2330000	3010000	2530000	3260000	3440000	3120000	3430000	C03137	--
pmb2620	207.1	5.99	208.064	C11H12O4	[M-H]-	3,4-Dimethoxycinnamic acid	3,4-二甲氧基肉桂酸	Phenolic acids	酚酸类	Phenolic acids	酚酸类	14737-89-4	B	92000	121000	136000	36700	40700	85200	158000	174000	277000	125000	90000	128000	142000	137000	142000	127000	--	--
pmb2640	199	8.62	200.162	C12H24O2	[M-H]-	Lauric acid	月桂酸(十二烷酸)	Lipids	脂质	Free fatty acids	游离脂肪酸	143-07-7	A	6640	5410	5330	5710	6360	6350	6980	8210	8330	5880	6340	6340	7550	6220	7000	6340	C02679	ko00061,ko01100
pmb2643	225	9	226.176	C14H26O2	[M-H]-	Myristoleic acid	肉豆蔻油酸	Lipids	脂质	Free fatty acids	游离脂肪酸	544-64-9	A	2270	1560	2380	1210	1240	1990	12500	15300	14400	4500	4640	4200	4460	4990	4850	4610	C08322	--
pmb2778	295	7.92	296.214	C18H32O3	[M-H]-	9,10-EODE	9,10-环氧十八碳二烯酸	Lipids	脂质	Free fatty acids	游离脂肪酸	65167-83-1	A	6220000	6440000	6060000	7120000	8160000	8340000	5730000	7350000	6180000	4020000	3300000	3760000	6330000	6730000	6350000	6420000	--	--
pmb2786	293	7.37	294.199	C18H30O3	[M-H]-	9-HOTrE	9-羟基十八碳三烯酸	Lipids	脂质	Free fatty acids	游离脂肪酸	89886-42-0	A	635000	648000	607000	631000	677000	710000	512000	658000	588000	413000	334000	383000	609000	617000	598000	624000	--	--
pmb2792	293	6.77	294.199	C18H30O3	[M-H]-	13-HOTrE(r)	13-羟基十八碳三烯酸(r)	Lipids	脂质	Free fatty acids	游离脂肪酸	74784-20-6	B	62600	34600	49500	29500	42500	76000	110000	65100	51500	40200	79800	61900	58400	60400	58700	58100	--	--
pmb2799	295	8.7	296.214	C18H32O3	[M-H]-	12,13-EODE	12,13-环氧十八碳二烯酸	Lipids	脂质	Free fatty acids	游离脂肪酸	6799-85-5	A	45300	40800	40000	50400	51200	54600	35400	41400	36300	29600	26900	29800	40800	43400	39900	39300	--	--
pmb2871	315.1	2.4	316.065	C13H16O9	[M-H]-	2,5-Dihydroxy benzoic acid O-hexside	2,5-二羟基苯甲酸 O-己糖苷	Phenolic acids	酚酸类	Phenolic acids	酚酸类	-	A	4540000	4420000	4060000	3440000	2050000	4190000	2990000	3390000	3200000	6250000	4290000	5320000	3720000	3830000	3830000	3910000	--	--
pmb2922	565.1	1.62	566.029	C15H24N2O17P2	[M-H]-	Uridine 5'-diphospho-D-glucose	尿苷 5'-二磷酸-D-葡萄糖	Nucleotides and derivatives	核苷酸及其衍生物	Nucleotides and derivatives	核苷酸及其衍生物	133-89-1	B	283000	281000	285000	273000	343000	279000	352000	384000	420000	427000	482000	392000	346000	280000	289000	271000	C00029	ko00040,ko00052,ko00053,ko00240,ko00500,ko00520,ko00561,ko00908,ko01100
pmb2947	865.1	4.01	866.172	C45H38O18	[M-H]-	Catechin-catechin-catechin	三儿茶素	Tannins	鞣质	Proanthocyanidins	原花青素	-	A	867000	833000	820000	608000	523000	803000	733000	1000000	988000	673000	866000	824000	825000	828000	761000	826000	--	--
pmb2957	465.1	3	466.073	C24H18O10	[M-H]-	Cyanidin O-syringic acid	矢车菊素 O-丁香酸	Flavonoids	黄酮	Anthocyanins	花青素	-	B	14500	28300	19500	58100	38600	22500	143000	104000	143000	56800	83200	38200	49300	39900	45000	35200	--	--
pmb2992	459.1	4.21	460.082	C22H20O11	[M-H]-	Acacetin-O-glucuronic acid	金合欢素-O-葡萄糖醛酸	Flavonoids	黄酮	Flavonoid	黄酮	-	B	141000	115000	98500	198000	158000	106000	43600	35000	76600	120000	124000	122000	129000	123000	123000	116000	--	--
pmb3006	431.1	4.61	432.088	C21H20O10	[M-H]-	Apigenin 7-O-glucoside(Cosmosiin)	芹菜素 7-O-葡萄糖苷	Flavonoids	黄酮	Flavonoid	黄酮	578-74-5	B	38700	33900	27100	40800	37000	49100	55100	42700	49500	60600	30800	41800	28400	38800	38800	37700	C04608	ko00944
pmb3023	449.1	3.8	450.096	C21H22O11	[M-H]-	Eriodictyol C-hexoside	圣草酚 C-己糖	Flavonoids	黄酮	Dihydroflavone	二氢黄酮	-	B	149000	99500	95200	287000	326000	195000	184000	104000	177000	311000	286000	336000	181000	160000	154000	127000	--	--
pmb3024	447.1	3.87	448.082	C21H20O11	[M-H]-	Luteolin C-hexoside	木犀草素 C-己糖苷	Flavonoids	黄酮	Flavonoid	黄酮	-	B	98700	82700	76700	216000	210000	123000	91200	64200	74400	74000	187000	158000	90500	105000	109000	88800	--	--
pmb3026	505.1	4.41	506.085	C23H22O13	[M-H]-	Quercetin O-acetylhexoside	槲皮素 O-乙酰基己糖苷	Flavonoids	黄酮	Flavonoid	黄酮	-	B	197000	336000	149000	231000	212000	296000	186000	194000	226000	392000	244000	176000	305000	217000	198000	240000	--	--
pmb3041	521.1	4.24	522.08	C23H22O14	[M-H]-	Tricin O-saccharic acid	麦黄酮 O-葡萄糖二酸	Flavonoids	黄酮	Flavonoid	黄酮	-	B	259000	334000	311000	322000	406000	538000	898000	751000	1040000	394000	288000	348000	447000	416000	479000	415000	--	--
pmb3064	499.2	2.95	500.128	C22H28O13	[M-H]-	3-O-p-coumaroyl quinic acid O-hexoside	3-O-对香豆酰奎尼酸-O-己糖苷	Phenolic acids	酚酸类	Phenolic acids	酚酸类	-	B	126000	143000	162000	140000	119000	215000	128000	144000	119000	156000	180000	193000	180000	164000	153000	148000	--	--
pmb3074	337.1	3.96	338.085	C16H18O8	[M-H]-	3-O-p-Coumaroyl quinic acid	3-O-对香豆酰奎尼酸	Phenolic acids	酚酸类	Phenolic acids	酚酸类	1899-30-5	B	24200000	24600000	25000000	29700000	32900000	22400000	33600000	38000000	37500000	22900000	22200000	24500000	29400000	29700000	29400000	30700000	C12208	ko00940,ko00941,ko00945,ko01110
pmb3081	289.1	1.59	289.99	C6H11PO11	[M-H]-	Glucarate O-Phosphoric acid	磷酸葡糖酸	Others	其它类	Saccharides and Alcohols	糖及醇类	-	B	482000	506000	412000	698000	848000	746000	957000	768000	891000	745000	743000	944000	730000	633000	727000	753000	--	--
pmb3099	153	2.11	154.03	C4H11O4P	[M-H]-	Diethyl phosphate	磷酸二乙酯	Organic acids	有机酸	Organic acids	有机酸	598-02-7	B	214000	168000	137000	196000	182000	181000	192000	198000	155000	207000	209000	208000	193000	174000	170000	174000	C06608	--
pmb3114	561.1	3.95	562.125	C30H26O11	[M-H]-	Epicatechin-epiafzelechin	表儿茶素表阿夫儿茶精	Tannins	鞣质	Proanthocyanidins	原花青素	-	B	96200	98400	80400	119000	101000	127000	270000	196000	299000	116000	92600	147000	130000	122000	141000	119000	--	--
pmb3894	329.1	6.36	330.061	C17H14O7	[M-H]-	Di-O-methylquercetin	3,7-二氧-甲基槲皮素	Flavonoids	黄酮	Flavonols	黄酮醇	2068-02-2	A	306000	308000	314000	553000	646000	597000	434000	490000	440000	287000	237000	264000	402000	436000	433000	416000	C01265	ko00944
pmb4777	337.1	4.86	338.085	C16H18O8	[M-H]-	4-Hydroxy-7-methoxycoumarin-β-rhamnoside	4-羟基-7-氧甲基香豆素鼠李糖苷	Lignans and Coumarins	木脂素和香豆素	Coumarins	香豆素	-	B	42600	52300	47100	64900	55700	38700	47000	52700	55900	42700	61500	66700	50600	54700	55000	44400	--	--
pmd0130	468.3	6.5	467.268	C22H46NO7P	[M+H]+	LysoPC 14:0(2n isomer)	溶血磷脂酰胆碱 14:0(2n异构)	Lipids	脂质	LPC	溶血磷脂酰胆碱	-	B	54400	58500	44400	66700	72800	90600	43100	42800	42300	32800	32300	35700	60500	66400	56200	63200	--	--
pmd0132	496.33	7.57	495.296	C24H50NO7P	[M+H]+	LysoPC 16:0(2n isomer)	溶血磷脂酰胆碱 16:0(2n异构)	Lipids	脂质	LPC	溶血磷脂酰胆碱	-	B	8220000	8770000	8250000	9360000	10300000	11500000	4480000	5960000	4820000	3220000	3850000	3160000	7840000	9910000	9620000	9110000	--	--
pmd0136	524.36	8.69	523.325	C26H54NO7P	[M+H]+	LysoPC 18:0	溶血磷脂酰胆碱 18:0	Lipids	脂质	LPC	溶血磷脂酰胆碱	-	B	361000	374000	323000	432000	505000	481000	156000	166000	127000	119000	128000	123000	290000	407000	352000	312000	--	--
pmd0160	452.3	7.55	453.253	C21H44NO7P	[M-H]-	LysoPE 16:0(2n isomer)	溶血磷脂酰乙醇胺 16:0(2n异构)	Lipids	脂质	LPE	溶血磷脂酰乙醇胺	-	B	2200000	2470000	2200000	2380000	2890000	3120000	1570000	1950000	1460000	905000	967000	866000	2170000	2320000	2260000	1930000	--	--
pme0006	116.1	1.29	115.056	C5H9NO2	[M+H]+	L-Proline	L-脯氨酸	Amino acids and derivatives	氨基酸及其衍生物	Amino acids and derivatives	氨基酸及其衍生物	147-85-3	B	2430000	2480000	1960000	3550000	3270000	3140000	996000	1030000	1050000	1360000	1210000	1320000	2170000	2790000	2540000	2590000	C00148	ko00330,ko00332,ko00970,ko01100,ko01110,ko01230,ko02010
pme0008	176.1	1.26	175.084	C6H13N3O3	[M+H]+	L-Citrulline	L-瓜氨酸	Amino acids and derivatives	氨基酸及其衍生物	Amino acids and derivatives	氨基酸及其衍生物	372-75-8	B	379000	402000	373000	417000	432000	411000	474000	447000	517000	441000	406000	498000	412000	474000	483000	503000	C00327	ko00220,ko01100,ko01110,ko01230
pme0026	147	1.18	146.095	C6H14N2O2	[M+H]+	L-(+)-Lysine	L-(+)-赖氨酸	Amino acids and derivatives	氨基酸及其衍生物	Amino acids and derivatives	氨基酸及其衍生物	56-87-1	B	3310000	3900000	3410000	4710000	4540000	4350000	863000	854000	768000	652000	494000	502000	2930000	3350000	3290000	3080000	C00047	ko00300,ko00310,ko00780,ko00960,ko00970,ko01100,ko01110,ko01210,ko01230,ko02010
pme0040	136.1	1.62	135.049	C5H5N5	[M+H]+	Adenine	腺嘌呤	Nucleotides and derivatives	核苷酸及其衍生物	Nucleotides and derivatives	核苷酸及其衍生物	73-24-5	A	5210000	5310000	5290000	11400000	10100000	12500000	7660000	9000000	7130000	8690000	5730000	7090000	8040000	8470000	8330000	8380000	C00147	ko00230,ko00908,ko01100
pme0088	285	5.54	286.038	C15H10O6	[M-H]-	Luteolin	木犀草素	Flavonoids	黄酮	Flavonoid	黄酮	491-70-3	A	194000	163000	140000	449000	463000	441000	570000	378000	439000	346000	377000	391000	333000	331000	353000	352000	C01514	ko00941,ko00944,ko01100,ko01110
pme0183	152.1	1.35	151.043	C5H5N5O	[M+H]+	2-Hydroxy-6-aminopurine	2-羟基-6-氨基嘌呤	Nucleotides and derivatives	核苷酸及其衍生物	Nucleotides and derivatives	核苷酸及其衍生物	3373-53-3	B	40500	45100	40300	43600	50600	39500	23700	30900	26300	40800	27300	34900	36600	37900	34100	29200	--	--
pme0193	147.07	1.18	146.06	C5H10N2O3	[M+H]+	L-Glutamine	L-谷氨酰胺	Amino acids and derivatives	氨基酸及其衍生物	Amino acids and derivatives	氨基酸及其衍生物	56-85-9	B	3630000	4140000	3670000	5400000	4810000	4300000	810000	812000	739000	721000	514000	588000	3020000	3260000	3070000	3120000	C00064	ko00220,ko00230,ko00240,ko00250,ko00630,ko00910,ko00970,ko01100,ko01230,ko02010
pme0230	268.1	2.38	267.084	C10H13N5O4	[M+H]+	Adenosine	腺苷	Nucleotides and derivatives	核苷酸及其衍生物	Nucleotides and derivatives	核苷酸及其衍生物	58-61-7	A	6980000	6790000	6870000	15100000	15100000	18000000	6950000	7230000	8710000	8320000	8750000	7640000	11300000	12800000	12800000	11700000	C00212	ko00230,ko01100,ko02010
pme0241	123.04	5.03	122.032	C7H6O2	[M+H]+	Benzoic acid	苯甲酸	Phenolic acids	酚酸类	Phenolic acids	酚酸类	65-85-0	A	23200	16100	15600	18700	26100	24400	14200	12000	11000	23800	15800	24900	27300	31800	16700	32800	C00180	ko00360,ko01100,ko01110
pme0256	151.03	1.67	152.028	C5H4N4O2	[M-H]-	Xanthine	黄嘌呤	Nucleotides and derivatives	核苷酸及其衍生物	Nucleotides and derivatives	核苷酸及其衍生物	69-89-6	B	24500	27300	33500	41300	34200	41300	63700	89400	119000	57300	45000	64300	40000	44300	45700	44900	C00385	ko00230,ko00232,ko01100,ko01110
pme0257	111.03	1.5	112.023	C4H4N2O2	[M-H]-	Uracil	尿嘧啶	Nucleotides and derivatives	核苷酸及其衍生物	Nucleotides and derivatives	核苷酸及其衍生物	66-22-8	B	60100	61200	53500	55000	63300	49800	60300	57900	55100	59600	62700	59600	52600	54000	52800	54100	C00106	ko00240,ko00410,ko00770,ko01100
pme0264	243.09	2.58	242.078	C10H14N2O5	[M+H]+	Thymidine	胸苷	Nucleotides and derivatives	核苷酸及其衍生物	Nucleotides and derivatives	核苷酸及其衍生物	50-89-5	B	787000	703000	599000	765000	710000	789000	789000	981000	890000	877000	1080000	725000	722000	1020000	988000	938000	C00214	ko00240,ko01100
pme0274	132.09	1.5	131.085	C6H13NO2	[M+H]+	6-Aminocaproic acid	6-氨基己酸	Organic acids	有机酸	Organic acids	有机酸	60-32-2	B	4540000	4170000	3920000	5480000	6150000	4750000	729000	852000	820000	1030000	828000	1050000	3420000	3660000	3620000	3600000	C02378	ko01100
pme0281	165.03	3.5	166.021	C8H6O4	[M-H]-	Terephthalic acid	对苯二甲酸	Phenolic acids	酚酸类	Phenolic acids	酚酸类	100-21-0	B	1590000	1550000	1380000	1390000	1140000	1550000	1440000	1500000	1250000	1330000	1260000	1390000	1360000	1230000	1330000	1190000	C06337	ko01100
pme0282	165.03	3.48	166.021	C8H6O4	[M-H]-	Phthalic acid	邻苯二甲酸	Organic acids	有机酸	Organic acids	有机酸	88-99-3	A	171000	164000	139000	135000	125000	171000	139000	157000	127000	151000	128000	138000	142000	125000	137000	122000	C01606	ko01100,ko02010
pme0295	146.07	2.09	145.065	C6H11NO3	[M+H]+	4-Acetamidobutyric acid	4-乙酰氨基丁酸	Organic acids	有机酸	Organic acids	有机酸	3025-96-5	B	1480000	1210000	1310000	797000	877000	685000	975000	1140000	939000	1000000	1040000	837000	1010000	1240000	1080000	1110000	C02946	ko00330,ko01100
pme0309	183.04	3.61	184.029	C8H8O5	[M-H]-	Methyl gallate	没食子酸甲酯	Flavonoids	黄酮	Flavanols	黄烷醇类	99-24-1	A	57500000	60300000	58200000	41500000	40300000	42100000	35400000	42100000	33800000	41800000	40300000	35400000	50000000	48700000	50100000	48700000	--	--
pme0321	431.11	5.22	432.088	C21H20O10	[M-H]-	Kaempferol 7-O-rhamnoside	山奈酚 7-O-鼠李糖苷	Flavonoids	黄酮	Flavonols	黄酮醇	20196-89-8	A	761000	290000	264000	1810000	283000	764000	28900	40200	55600	2110000	508000	197000	925000	792000	888000	832000	--	--
pme0368	579.16	4.46	578.137	C27H30O14	[M+H]+	Apigenin 7-rutinoside(Isorhoifolin)	异野漆树苷	Flavonoids	黄酮	Flavonoid	黄酮	552-57-8	B	435000	219000	927000	501000	284000	162000	299000	300000	384000	115000	147000	95800	256000	367000	269000	295000	--	--
pme0369	593.16	4.29	594.132	C27H30O15	[M-H]-	Kaempferol 3-O-rutinoside(Nicotiflorin)	烟花苷(山奈酚 3-O-芸香糖苷)	Flavonoids	黄酮	Flavonols	黄酮醇	17650-84-9	B	20900000	19400000	17300000	22300000	26000000	26700000	16200000	15300000	17400000	24900000	20700000	23100000	21000000	20900000	22400000	21800000	--	--
pme0376	271.07	6.04	272.058	C15H12O5	[M-H]-	Naringenin	柚皮素	Flavonoids	黄酮	Dihydroflavone	二氢黄酮	480-41-1	B	1680000	1540000	1790000	2160000	1920000	2710000	2660000	3000000	3170000	1620000	1310000	1390000	2070000	2120000	1870000	2220000	C00509	ko00941,ko00943,ko01100,ko01110
pme0434	577	3.37	578.12	C30H26O12	[M-H]-	Procyanidin B2	原花青素 B2	Tannins	鞣质	Proanthocyanidins	原花青素	29106-49-8	B	17100000	14500000	15000000	13800000	13500000	16400000	13700000	14300000	15800000	12900000	14400000	15300000	14400000	14900000	14800000	15500000	--	--
pme0443	493	3.37	493.112	C23H25O12	[M]+	Malvidin 3-O-galactoside	锦葵色素 3-O-半乳糖苷	Flavonoids	黄酮	Anthocyanins	花青素	30113-37-2	B	36400	22200	23800	22900	22400	18700	14600	16000	17400	33000	22900	16600	25700	21700	28200	29700	--	--
pme0460	291	3.77	290.067	C15H14O6	[M+H]+	L-Epicatechin	表儿茶素	Flavonoids	黄酮	Flavanols	黄烷醇类	490-46-0	A	2890000	3080000	3310000	4290000	4500000	4440000	4140000	4240000	4840000	3810000	3710000	3900000	3990000	3420000	3470000	3910000	C09727	ko00941,ko01100,ko01110
pme0513	151	1.27	152.058	C5H12O5	[M-H]-	Xylitol	木糖醇	Others	其它类	Saccharides and Alcohols	糖及醇类	87-99-0	B	142000	141000	159000	88700	79500	91800	58800	78700	61000	75700	63500	55900	91100	78800	81400	74200	C00379	ko00040,ko01100,ko02010
pme0516	179.16	1.24	180.053	C6H12O6	[M-H]-	Inositol	肌醇	Others	其它类	Saccharides and Alcohols	糖及醇类	87-89-8	B	347000	294000	358000	431000	438000	413000	356000	352000	348000	419000	397000	392000	359000	364000	373000	341000	C00137	ko00052,ko00053,ko00562,ko01100,ko02010,ko04070
pme0519	341	1.28	342.096	C12H22O11	[M-H]-	D-(+)-Sucrose	D-(+)-蔗糖	Others	其它类	Saccharides and Alcohols	糖及醇类	57-50-1	A	3090000	2750000	3110000	4990000	4300000	5410000	4830000	4820000	4400000	7980000	5930000	5570000	5450000	4760000	5400000	5040000	--	--
pme0534	195.16	1.2	196.047	C6H12O7	[M-H]-	Gluconic acid	葡萄糖酸	Others	其它类	Saccharides and Alcohols	糖及醇类	526-95-4	B	307000	324000	341000	363000	302000	333000	335000	293000	317000	420000	397000	368000	321000	297000	346000	305000	C00257	ko00030,ko01100,ko01110,ko01200
pme1002	138.08	1.7	137.076	C8H11NO	[M+H]+	L-Tyramine	酪胺	Amino acids and derivatives	氨基酸及其衍生物	Amino acids and derivatives	氨基酸及其衍生物	51-67-2	A	3890000	4270000	5380000	3110000	4740000	5410000	9000000	3250000	4360000	138000	256000	162000	3980000	4210000	4060000	3900000	C00483	ko00350,ko00950,ko01100,ko01110
pme1109	152	1.65	151.043	C5H5N5O	[M+H]+	Guanine	鸟嘌呤	Nucleotides and derivatives	核苷酸及其衍生物	Nucleotides and derivatives	核苷酸及其衍生物	73-40-5	B	200000	241000	209000	179000	121000	142000	118000	98500	68200	174000	176000	145000	146000	169000	151000	166000	C00242	ko00230,ko01100
pme1173	137	1.87	136.033	C5H4N4O	[M+H]+	Allopurinol	别嘌呤醇	Nucleotides and derivatives	核苷酸及其衍生物	Nucleotides and derivatives	核苷酸及其衍生物	315-30-0	B	24100	22300	22100	32100	32900	29600	36400	46900	42900	46200	45400	38900	39300	41300	26200	36500	--	--
pme1178	284.09	1.96	283.078	C10H13N5O5	[M+H]+	Guanosine	鸟苷	Nucleotides and derivatives	核苷酸及其衍生物	Nucleotides and derivatives	核苷酸及其衍生物	118-00-3	A	16200000	14200000	15600000	37200000	40400000	45800000	15000000	17500000	18700000	18700000	17000000	15700000	24000000	31100000	26500000	26700000	C00387	ko00230,ko01100,ko02010
pme1201	273.08	6.02	274.073	C15H14O5	[M-H]-	Phloretin	根皮素	Flavonoids	黄酮	Chalcones	查耳酮	60-82-2	B	50800	47400	44200	39500	39400	98500	91500	79300	68400	697000	289000	847000	140000	157000	160000	153000	C00774	ko00941,ko01110
pme1266	167.1	2.36	166.042	C6H6N4O2	[M+H]+	3-Methylxanthine	3-甲基黄嘌呤	Nucleotides and derivatives	核苷酸及其衍生物	Nucleotides and derivatives	核苷酸及其衍生物	1076-22-8	A	9500000	10100000	8970000	10500000	9080000	8430000	11200000	12000000	11400000	8070000	9880000	9380000	10400000	13900000	12500000	14100000	C16357	ko00232,ko01100,ko01110
pme1383	170.1	1.61	169.065	C8H11NO3	[M+H]+	Pyridoxine	吡哆素	Others	其它类	Vitamin	维生素	65-23-6	B	660000	588000	645000	680000	630000	626000	503000	438000	406000	461000	378000	455000	549000	639000	621000	607000	C00314	ko00750,ko01100
pme1398	465.1	2.88	465.084	C21H21O12	[M]+	Delphinidin 3-O-glucoside(Mirtillin)	花翠素 3-O-葡萄糖苷	Flavonoids	黄酮	Anthocyanins	花青素	6906-38-3	B	209000	311000	213000	280000	376000	152000	511000	540000	468000	285000	312000	275000	261000	260000	313000	307000	C12138	ko00942
pme1439	165.05	4.29	164.041	C9H8O3	[M+H]+	p-Coumaric acid	对香豆酸	Phenolic acids	酚酸类	Phenolic acids	酚酸类	501-98-4	B	94500	83100	81400	102000	80400	73800	72900	85500	73500	76100	43300	57400	68900	105000	74600	79300	C00811	ko00130,ko00350,ko00940,ko00950,ko00999,ko01100,ko01110
pme1474	298	3.35	297.075	C11H15N5O3S	[M+H]+	5'-Deoxy-5'-(methylthio)adenosine	5-脱氧-5-甲硫腺苷	Nucleotides and derivatives	核苷酸及其衍生物	Nucleotides and derivatives	核苷酸及其衍生物	2457-80-9	A	2180000	2370000	2080000	1990000	2420000	1870000	1840000	1680000	1740000	1610000	1990000	1720000	2010000	1750000	2130000	2100000	C00170	ko00270,ko00908,ko01100
pme1605	593.16	4.16	594.132	C27H30O15	[M-H]-	Kaempferol 3-O-robinobioside(Biorobin)	山奈酚 3-O-洋槐糖苷	Flavonoids	黄酮	Flavonols	黄酮醇	17297-56-2	B	16500000	16700000	14700000	20900000	22500000	23900000	16000000	12500000	15800000	19300000	18300000	23200000	19300000	19100000	17100000	16700000	--	--
pme1611	433.12	4.22	434.102	C21H22O10	[M-H]-	Isohemiphloin	异柚葡糖苷	Flavonoids	黄酮	Flavonoid carbonoside	黄酮碳糖苷	3682-02-8	A	1320000	1120000	1060000	1470000	1430000	1560000	1460000	1440000	1640000	1600000	1470000	1340000	1290000	1230000	1330000	1210000	--	--
pme1816	353	3.08	354.079	C16H18O9	[M-H]-	Neochlorogenic acid(5-O-Caffeoylquinic acid)	新绿原酸	Phenolic acids	酚酸类	Phenolic acids	酚酸类	906-33-2	A	805000	871000	741000	1090000	1450000	1310000	1050000	1220000	1170000	876000	847000	844000	1120000	1070000	1040000	1150000	C17147	--
pme2019	149	1.27	150.044	C5H10O5	[M-H]-	DL-Arabinose	DL-阿拉伯糖	Others	其它类	Saccharides and Alcohols	糖及醇类	147-81-9	B	274000	275000	303000	244000	229000	260000	240000	243000	229000	257000	253000	226000	246000	219000	241000	241000	--	--
pme2237	181.08	1.25	182.067	C6H14O6	[M-H]-	Dulcitol	己六醇	Others	其它类	Saccharides and Alcohols	糖及醇类	608-66-2	B	287000	289000	352000	130000	84000	119000	144000	144000	119000	126000	106000	96000	132000	141000	147000	131000	C01697	ko00052,ko01100
pme2493	579.2	4.27	578.137	C27H30O14	[M+H]+	Kaempferol 3,7-dirhamnoside(Kaempferitrin)	山奈苷	Flavonoids	黄酮	Flavonols	黄酮醇	482-38-2	B	161000	155000	205000	178000	205000	193000	445000	319000	325000	165000	188000	254000	213000	225000	233000	176000	C16981	--
pme2596	184.05	2.17	183.045	C8H9NO4	[M+H]+	4-Pyridoxic acid	4-吡哆酸	Others	其它类	Vitamin	维生素	82-82-6	B	68100	67800	62900	72700	58000	66600	52300	52400	50600	76400	69200	73700	66500	80700	75100	72000	C00847	ko00750,ko01100
pme2634	118	1.34	117.07	C5H11NO2	[M+H]+	DL-Norvaline	DL-正缬氨酸	Amino acids and derivatives	氨基酸及其衍生物	Amino acids and derivatives	氨基酸及其衍生物	760-78-1	A	37200000	39900000	38000000	51400000	51100000	42500000	7490000	7690000	6980000	10500000	6990000	8370000	31800000	34000000	32800000	34300000	C01826	--
pme2758	162	1.28	163.039	C5H9NO5	[M-H]-	4-Hydroxy-L-glutamic acid	4-羟基-L-谷氨酸	Amino acids and derivatives	氨基酸及其衍生物	Amino acids and derivatives	氨基酸及其衍生物	3913-68-6	B	325000	326000	280000	281000	214000	249000	259000	231000	258000	541000	561000	514000	315000	320000	298000	305000	C03079	--
pme2801	167	2.24	166.042	C6H6N4O2	[M+H]+	7-Methylxanthine	7-甲基黄嘌呤	Nucleotides and derivatives	核苷酸及其衍生物	Nucleotides and derivatives	核苷酸及其衍生物	552-62-5	A	2040000	2110000	1970000	1880000	1740000	1830000	2420000	2430000	2110000	1510000	1940000	1880000	1890000	3110000	2640000	2700000	C16353	ko00232,ko01100,ko01110
pme2890	269	1.31	268.041	C8H16N2O4S2	[M+H]+	L-Homocystine	L-高胱氨酸	Amino acids and derivatives	氨基酸及其衍生物	Amino acids and derivatives	氨基酸及其衍生物	626-72-2	B	136000	134000	162000	412000	551000	594000	201000	201000	132000	250000	226000	148000	230000	372000	203000	201000	C01817	ko00270
pme2914	161	1.9	162.044	C6H10O5	[M-H]-	3-Hydroxy-3-methylpentane-1,5-dioic acid	3-羟基-3-甲基谷氨酸	Amino acids and derivatives	氨基酸及其衍生物	Amino acids and derivatives	氨基酸及其衍生物	503-49-1	A	290000	275000	296000	240000	319000	257000	286000	319000	333000	319000	297000	270000	182000	257000	286000	237000	C03761	--
pme2954	303.04	5.58	302.033	C15H10O7	[M+H]+	Quercetin	槲皮素	Flavonoids	黄酮	Flavonols	黄酮醇	117-39-5	A	648000	453000	482000	821000	598000	784000	518000	401000	734000	505000	500000	522000	545000	545000	607000	512000	C00389	ko00941,ko00944,ko01100,ko01110
pme3009	175	1.09	174.009	C6H6O6	[M+H]+	Trans-Citridic acid	反式乌头酸	Organic acids	有机酸	Organic acids	有机酸	4023-65-8	B	46400	48400	56200	54800	47200	43100	43600	44300	60900	42600	44600	43300	44300	53400	47800	47600	--	--
pme3011	104.06	1.27	103.056	C4H9NO2	[M+H]+	γ-Aminobutyric acid	γ-氨基丁酸	Organic acids	有机酸	Organic acids	有机酸	56-12-2	B	160000	129000	99100	319000	403000	257000	154000	156000	162000	176000	148000	204000	180000	224000	198000	192000	C00334	ko00250,ko00330,ko00410,ko00650,ko00760,ko01100
pme3017	104	1.24	103.056	C4H9NO2	[M+H]+	2-Aminoisobutyric acid	2-氨基异丁酸	Amino acids and derivatives	氨基酸及其衍生物	Amino acids and derivatives	氨基酸及其衍生物	62-57-7	B	1180000	1050000	951000	1790000	2240000	1830000	1180000	1290000	1050000	987000	924000	939000	1340000	1570000	1580000	1480000	C03665	--
pme3033	104	1.25	103.056	C4H9NO2	[M+H]+	N,N-Dimethylglycine	N,N-二甲基甘氨酸	Amino acids and derivatives	氨基酸及其衍生物	Amino acids and derivatives	氨基酸及其衍生物	1118-68-9	B	156000	150000	123000	275000	324000	274000	178000	167000	157000	160000	131000	155000	160000	241000	207000	212000	C01026	ko00260,ko01100
pme3184	332	1.64	331.053	C10H14N5O6P	[M+H]+	2'-Deoxyadenosine-5'-monophosphate	2'-脱氧腺苷-5'-单磷酸	Nucleotides and derivatives	核苷酸及其衍生物	Nucleotides and derivatives	核苷酸及其衍生物	653-63-4	B	29700	19900	25800	64400	33100	26000	24400	20500	22100	23700	23000	31100	24000	24800	40700	45100	C00360	ko00230,ko01100
pme3188	323	1.73	324.021	C9H13N2O9P	[M-H]-	Uridine 5'-monophosphate	5-尿嘧啶核苷酸(5-UMP)	Nucleotides and derivatives	核苷酸及其衍生物	Nucleotides and derivatives	核苷酸及其衍生物	58-97-9	B	465000	406000	535000	1090000	1010000	889000	347000	414000	564000	546000	461000	510000	575000	773000	631000	733000	C00105	ko00240,ko01100
pme3207	141.03	1.19	142.021	C6H6O4	[M-H]-	Trans,trans-Muconic acid	反,反-粘康酸	Organic acids	有机酸	Organic acids	有机酸	3588-17-8	B	307000	392000	292000	321000	407000	355000	321000	414000	374000	308000	310000	232000	286000	309000	278000	371000	--	--
pme3211	463	4.31	464.076	C21H20O12	[M-H]-	Quercetin 3-O-glucoside(Isotrifoliin)	异槲皮甙	Flavonoids	黄酮	Flavonols	黄酮醇	21637-25-2	A	1720000	1660000	1610000	2600000	3330000	2720000	3600000	3390000	5070000	1970000	2860000	2650000	2960000	2070000	2170000	2040000	C05623	ko00944,ko01100,ko01110
pme3227	579	3.99	578.137	C27H30O14	[M+H]+	Vitexin 2''-O-β-L-rhamnoside	牡荆素-2-O-鼠李糖苷	Flavonoids	黄酮	Flavonoid carbonoside	黄酮碳糖苷	64820-99-1	B	499000	508000	302000	1370000	1680000	575000	537000	280000	418000	334000	351000	610000	629000	734000	621000	827000	C12628	ko00944
pme3285	275	3.78	274.073	C15H14O5	[M+H]+	Afzelechin(3,5,7,4'-Tetrahydroxyflavan)	阿福豆素	Flavonoids	黄酮	Isoflavones	异黄酮	2545-00-8	B	111000	99200	117000	99900	48800	90300	49800	54900	41300	222000	184000	178000	95200	112000	115000	108000	C09320	ko00941,ko01110
pme3337	384	2.67	383.09	C14H17N5O8	[M+H]+	N6-Succinyl Adenosine	N6-琥珀酰腺苷	Nucleotides and derivatives	核苷酸及其衍生物	Nucleotides and derivatives	核苷酸及其衍生物	4542-23-8	B	632000	695000	822000	602000	533000	547000	355000	385000	340000	466000	489000	523000	535000	680000	634000	560000	--	--
pme3388	189	1.18	188.114	C7H16N4O2	[M+H]+	H-HomoArg-OH	高精氨酸	Amino acids and derivatives	氨基酸及其衍生物	Amino acids and derivatives	氨基酸及其衍生物	156-86-5	A	78200	70500	70000	101000	106000	104000	119000	129000	147000	77500	97400	96500	102000	128000	111000	108000	C01924	--
pme3400	447.12	5.68	446.102	C22H22O10	[M+H]+	Sissotrin	鹰嘴豆素 7-O-葡萄糖苷(印度黄檀苷)	Flavonoids	黄酮	Isoflavones	异黄酮	5928-26-7	B	91400	57200	87700	136000	160000	141000	95700	47200	92300	191000	152000	147000	95500	156000	107000	109000	C05376	ko00943
pme3475	273.07	6.1	272.058	C15H12O5	[M+H]+	Butin	紫铆素	Flavonoids	黄酮	Dihydroflavone	二氢黄酮	492-14-8	A	1050000	1040000	1090000	1420000	1250000	1650000	1530000	1730000	1960000	962000	850000	871000	1070000	1460000	1410000	1240000	C09614	ko00941
pme3705	193.14	1.22	194.033	C6H10O7	[M-H]-	D-Glucoronic acid	D-葡萄糖醛酸	Others	其它类	Saccharides and Alcohols	糖及醇类	6556-12-3	B	64600	57400	75600	71500	66100	68100	68100	62800	80000	76200	68400	66300	61900	65100	61300	58400	C00191	ko00040,ko00053,ko00520,ko00562,ko01100
pme3732	244.09	1.32	243.073	C9H13N3O5	[M+H]+	Cytidine	胞苷	Nucleotides and derivatives	核苷酸及其衍生物	Nucleotides and derivatives	核苷酸及其衍生物	65-46-3	B	314000	316000	340000	780000	734000	647000	225000	231000	240000	258000	200000	240000	391000	483000	455000	511000	C00475	ko00240,ko01100,ko02010
pme3961	252	2.46	251.089	C10H13N5O3	[M+H]+	Deoxyadenosine	2-脱氧腺苷	Nucleotides and derivatives	核苷酸及其衍生物	Nucleotides and derivatives	核苷酸及其衍生物	958-09-8	B	763000	784000	835000	4930000	5910000	4540000	877000	1350000	1140000	1160000	1240000	1090000	1810000	2130000	2020000	2040000	C00559	ko00230,ko01100,ko02010
pme3967	312	2.73	311.107	C12H17N5O5	[M+H]+	2-(Dimethylamino)guanosine	二甲基氨基鸟苷	Nucleotides and derivatives	核苷酸及其衍生物	Nucleotides and derivatives	核苷酸及其衍生物	2140-67-2	A	1760000	1650000	2000000	2200000	2550000	2000000	1200000	1300000	1380000	1990000	1420000	1530000	1940000	2220000	2000000	1990000	--	--
pme3968	166	1.8	165.057	C6H7N5O	[M+H]+	7-Methylguanine	7-甲基鸟嘌呤	Nucleotides and derivatives	核苷酸及其衍生物	Nucleotides and derivatives	核苷酸及其衍生物	578-76-7	B	112000	122000	109000	138000	117000	128000	111000	101000	94500	142000	106000	101000	128000	137000	120000	120000	C02242	--
pmf0374	477.1	4.69	478.091	C22H22O12	[M-H]-	2,6-Dimethyl-7-octene-2,3,6-triol	2,6-二甲基-7-辛烯-2,3,6-三醇	Flavonoids	黄酮	Flavonoid	黄酮	5041-82-7	B	193000	185000	206000	190000	239000	205000	307000	219000	286000	219000	384000	274000	192000	228000	241000	263000	--	--
pmf0608	161.03	4.65	162.026	C9H6O3	[M-H]-	Oxalic acid	草酸	Phenolic acids	酚酸类	Phenolic acids	酚酸类	93-35-6	A	78300	103000	94000	129000	181000	87700	141000	168000	147000	92100	81600	78200	125000	131000	119000	116000	C09315	ko00940,ko01110
pmn001367	315.07	2.39	316.065	C13H16O9	[M-H]-	Protocatechuic acid-4-glucoside	原儿茶酸-4-葡萄糖苷	Phenolic acids	酚酸类	Phenolic acids	酚酸类	-	B	6470000	6650000	5800000	5150000	4030000	6040000	4930000	5250000	4780000	8510000	6320000	6960000	5620000	5550000	5140000	5860000	--	--
pmn001375	535.18	4.26	536.163	C26H32O12	[M-H]-	1-Hydroxyterpinin monoglucoside	1-羟基松脂素单葡萄糖苷	Lignans and Coumarins	木脂素和香豆素	Lignans	木脂素	-	B	21000	24300	31300	29600	35000	28900	58500	60400	68200	36400	44300	27100	35200	38400	29800	41000	--	--
pmn001378	519.16	4.64	520.168	C26H32O11	[M-H]-	Terpineol monoglucoside	松脂醇单葡萄糖苷	Lignans and Coumarins	木脂素和香豆素	Lignans	木脂素	-	A	1670000	1790000	2030000	2500000	3190000	2220000	4420000	4660000	6010000	1800000	2550000	1740000	2640000	2980000	2480000	3300000	--	--
pmn001382	515.12	4.42	516.105	C25H24O12	[M-H]-	Isochlorogenic acid A	异绿原酸 A	Phenolic acids	酚酸类	Phenolic acids	酚酸类	2450-53-5	B	3810000	5340000	3890000	4560000	5240000	3430000	8660000	8960000	6620000	5780000	2960000	3510000	5030000	4730000	4620000	4400000	--	--
pmn001384	515.12	4.42	516.105	C25H24O12	[M-H]-	Isochlorogenic acid C	异绿原酸 C	Phenolic acids	酚酸类	Phenolic acids	酚酸类	57378-72-0	B	3980000	4740000	4780000	5040000	5120000	3810000	8360000	7890000	6130000	5860000	3850000	4050000	4830000	4270000	4270000	4870000	--	--
pmn001415	451.1	4.45	452.093	C24H20O9	[M-H]-	Catechin-(7,8-bc)-4β-(3,4-dihydroxyphenyl)-dihydro-2-(3H)-pyranone	儿茶素-(7,8-bc)-4β-(3,4-二羟基苯基)-二氢-2-(3h)-吡喃酮	Flavonoids	黄酮	Flavanols	黄烷醇类	-	B	1100000	1230000	1100000	1450000	1440000	1490000	2960000	2920000	3400000	1410000	1690000	1700000	1600000	1540000	1670000	1930000	--	--
pmn001416	451.1	4.72	452.093	C24H20O9	[M-H]-	Catechin-(7,8-bc)-4α-(3,4-dihydroxyphenyl)-dihydro-2-(3H)-pyranone	儿茶素-(7,8-bc)-4α-(3,4-二羟基苯基)-二氢-2-(3H)-吡喃酮	Flavonoids	黄酮	Flavanols	黄烷醇类	-	B	1050000	1340000	1230000	1570000	1280000	1190000	2740000	2760000	4290000	1350000	1590000	1470000	1800000	1410000	1620000	1600000	--	--
pmn001419	325.09	3.5	326.085	C15H18O8	[M-H]-	1-O-[(E)-p-Cumaroyl]-β-D-glucopyranose	1-O-[(E)-对香豆酰]-β-D-吡喃葡萄糖	Phenolic acids	酚酸类	Phenolic acids	酚酸类	-	B	10600000	8660000	8310000	13300000	8900000	13500000	7870000	8540000	5620000	11600000	8590000	9520000	8660000	8480000	9800000	9240000	--	--
pmn001420	341.08	3.43	342.079	C15H18O9	[M-H]-	1-O-[(E)-Caffeoyl]-β-D-glucopyranose	1-O-[(E)-咖啡酰]-β-D-吡喃葡萄糖	Phenolic acids	酚酸类	Phenolic acids	酚酸类	-	B	2370000	2730000	2450000	1850000	2040000	1350000	826000	588000	1470000	1380000	2410000	1660000	1780000	1850000	1670000	1730000	--	--
pmn001421	337.09	3.82	338.085	C16H18O8	[M-H]-	3-O-(E)-p-Coumaroyl quinic acid	3-O-(E)-对香豆蔻酰奎宁酸	Phenolic acids	酚酸类	Phenolic acids	酚酸类	87099-71-6	B	15800000	16400000	16200000	19100000	21400000	18700000	22900000	25300000	24800000	15100000	15500000	18100000	17600000	19200000	18600000	18100000	--	--
pmn001513	321	3.41	322.021	C14H10O9	[M-H]-	Galloylgallic acid	没食子酰没食子酸	Phenolic acids	酚酸类	Phenolic acids	酚酸类	536-08-3	A	5930000	6430000	9170000	3890000	6060000	5200000	2300000	3820000	2040000	4780000	4790000	5520000	5910000	6150000	6610000	5730000	--	--
pmn001515	325.1	2.62	326.05	C14H14O9	[M-H]-	3-Galloylshikimic acid	3-没食子酸	Phenolic acids	酚酸类	Phenolic acids	酚酸类	110082-91-2	B	114000	119000	128000	52900	49000	48800	50700	62400	34200	78900	69700	85100	78500	84800	89700	79600	--	--
pmn001516	325.1	2.65	326.05	C14H14O9	[M-H]-	5-Galloylshikimic acid	5-没食子酸	Phenolic acids	酚酸类	Phenolic acids	酚酸类	95719-51-0	B	233000	342000	295000	162000	88300	156000	147000	197000	103000	259000	185000	205000	217000	211000	223000	234000	--	--
pmn001517	329.1	2.75	330.113	C15H22O8	[M-H]-	3,4,5-Trimethoxyphenyl-β-D-Glucopyranoside	3,4,5-三甲氧基苯基 1-O-D-葡萄糖吡喃苷	Phenolic acids	酚酸类	Phenolic acids	酚酸类	-	B	159000	131000	157000	140000	81600	132000	105000	160000	128000	212000	171000	241000	140000	170000	177000	168000	--	--
pmn001518	331.1	1.96	332.059	C13H16O10	[M-H]-	1-O-Galloyl-β-D-glucose	邻苯三酰-β-D-葡萄糖	Phenolic acids	酚酸类	Phenolic acids	酚酸类	-	A	2460000	2710000	2590000	1780000	2080000	1430000	1730000	1970000	1610000	1950000	2610000	2170000	2040000	1850000	1910000	1700000	--	--
pmn001519	335	4.63	336.036	C15H12O9	[M-H]-	Galloyl Methyl gallate	棕榈酰没食子酸甲酯	Phenolic acids	酚酸类	Phenolic acids	酚酸类	-	B	10900000	13400000	19700000	4070000	4890000	6620000	4380000	5220000	3310000	3500000	4340000	3270000	7550000	8240000	7320000	7540000	--	--
pmn001526	483.08	2.85	484.065	C20H20O14	[M-H]-	1,6-Bis-O-galloyl-β-D-glucose	1,6-二-O-没食子酰基-β-D-葡萄糖	Phenolic acids	酚酸类	Phenolic acids	酚酸类	-	B	10200000	9400000	13700000	6440000	6780000	6390000	4610000	4090000	2580000	5050000	5950000	5720000	7510000	6380000	6050000	6040000	--	--
pmn001528	625	4.39	626.034	C28H18O17	[M-H]-	"Tetragallic Acid(3""-O-galloyl-4""-O-galloyl-4-O-galloyl-galloyl acid)"	四没食子酸	Phenolic acids	酚酸类	Phenolic acids	酚酸类	-	B	156000	183000	205000	71800	82100	80000	81100	87000	90200	87100	81700	59700	117000	107000	125000	117000	--	--
pmn001529	629.1	4.04	630.063	C28H22O17	[M-H]-	Tri-O-Galloylshikimic acid	三邻没食子酰莽草酸	Phenolic acids	酚酸类	Phenolic acids	酚酸类	-	B	171000	167000	202000	320000	568000	231000	201000	201000	197000	221000	188000	217000	253000	248000	251000	251000	--	--
pmn001530	635.1	3.6	636.071	C27H24O18	[M-H]-	2,4,6-Tri-O-Galloyl-D-Glucose	2,4,6-三-O-没食子酰-α-D-葡萄糖	Phenolic acids	酚酸类	Phenolic acids	酚酸类	108043-99-8	B	276000	362000	249000	126000	65700	104000	91800	31800	98800	211000	144000	169000	228000	193000	115000	207000	--	--
pmn001531	635.1	3.59	636.071	C27H24O18	[M-H]-	2,4,6-Tri-O-galloyl-β-D-glucose	2,4,6-三-O-没食子酰-β-D-葡萄糖	Phenolic acids	酚酸类	Phenolic acids	酚酸类	-	B	220000	268000	209000	104000	119000	211000	124000	82600	91600	190000	150000	167000	162000	152000	279000	151000	--	--
pmn001534	787.1	4.01	788.078	C34H28O22	[M-H]-	1,2,3,6-Tetragalloyl glucose	1,2,3,6-四-O-没食子酰基-β-D-葡萄糖	Phenolic acids	酚酸类	Phenolic acids	酚酸类	79886-50-3	B	261000	275000	390000	93500	88000	140000	128000	112000	103000	204000	104000	152000	135000	138000	194000	191000	--	--
pmn001546	943.1	5.58	944.113	C40H32O27	[M-H]-	Methyl 5-galloyl gallate	五-没食子酰基没食子酸甲酯	Phenolic acids	酚酸类	Phenolic acids	酚酸类	-	B	117000	88400	106000	102000	79500	107000	94300	106000	85700	140000	121000	124000	96200	113000	103000	89300	--	--
pmn001547	589.1	4.39	590.103	C27H26O15	[M-H]-	3-Hydroxy-5-Methylphenol-1-Oxy-β-D-(6'-O-Digalloyl)Glucose	3-羟基-5-甲基苯酚-1-氧-β-D-(6’-O-二没食子酰)葡萄糖	Phenolic acids	酚酸类	Phenolic acids	酚酸类	-	B	191000	97600	80400	156000	179000	132000	126000	124000	143000	93600	84200	77100	177000	143000	121000	123000	--	--
pmn001575	153	2.95	154.021	C7H6O4	[M-H]-	Gentisic acid	龙胆酸	Phenolic acids	酚酸类	Phenolic acids	酚酸类	490-79-9	B	5260000	5520000	4980000	6450000	7320000	7100000	5080000	6280000	5080000	5570000	4900000	5570000	6550000	6190000	6460000	6410000	C00628	ko00350,ko01100
pmn001578	255.23	10.72	256.219	C16H32O2	[M-H]-	Hexadecanoic acid	十六烷酸	Phenolic acids	酚酸类	Phenolic acids	酚酸类	57-10-3	A	4900000	5610000	4200000	4090000	4760000	4140000	2520000	2340000	2180000	1830000	1370000	1250000	1600000	3520000	2780000	1240000	C00249	ko00061,ko00062,ko00071,ko00073,ko01040,ko01100,ko01212
pmn001610	307.3	11.09	308.248	C20H36O2	[M-H]-	Eicosadienoic acid	二十碳二烯酸	Lipids	脂质	Free fatty acids	游离脂肪酸	5598-38-9	B	44100	42800	46800	54100	67200	52500	53000	54200	50000	33800	36000	32600	73200	50700	46900	57700	C16525	ko01040
pmn001622	633.1	3.64	634.057	C27H22O18	[M-H]-	Hexahydroxydiphenoyl galloylglucose	六羟基联苯没食子酸葡萄糖	Phenolic acids	酚酸类	Phenolic acids	酚酸类	-	A	189000	151000	341000	123000	161000	116000	72300	110000	70100	146000	157000	126000	214000	136000	164000	188000	--	--
pmn001627	331.1	1.92	332.059	C13H16O10	[M-H]-	Glucogallin	葡萄糖没食子鞣苷	Phenolic acids	酚酸类	Phenolic acids	酚酸类	58511-73-2	A	9800000	9620000	10300000	6300000	8880000	5490000	7480000	8400000	6790000	7340000	10400000	8850000	8070000	8220000	8020000	6650000	--	--
pmn001628	481.1	1.81	482.051	C20H18O14	[M-H]-	Hexahydroxydiphenoylglucose	六羟基联苯葡萄糖	Phenolic acids	酚酸类	Phenolic acids	酚酸类	-	A	1270000	1860000	2190000	976000	1350000	1440000	753000	933000	624000	971000	889000	1020000	1390000	1090000	1490000	1430000	--	--
pmn001632	787.1	4.12	788.078	C34H28O22	[M-H]-	Tetragalloylglucose	四苷醇葡萄糖	Tannins	鞣质	Tannin	鞣质	-	B	1840000	2270000	2280000	786000	767000	854000	791000	721000	758000	1250000	1180000	938000	1390000	1250000	1130000	1090000	--	--
pmn001639	447.1	4.68	448.082	C21H20O11	[M-H]-	Cynaroside	木犀草苷	Flavonoids	黄酮	Flavonoid	黄酮	5373-11-5	B	4270000	2280000	1410000	9190000	1230000	3810000	311000	374000	435000	4440000	3920000	1280000	4650000	4600000	4410000	4360000	--	--
pmn001640	449.1	4.29	450.062	C20H18O12	[M-H]-	Betmidin(Myricetin 3-α-L-arabinofuranoside)	杨梅黄酮 3-α-L-阿拉伯呋喃糖苷	Flavonoids	黄酮	Flavonols	黄酮醇	35589-22-1	B	1700000	1010000	995000	971000	931000	1180000	1490000	1110000	1770000	741000	926000	825000	1120000	981000	1040000	1050000	--	--
pmn001642	503.1	5.07	504.071	C23H20O13	[M-H]-	Kaempferol 3-O-β-(2''-O-acetyl-β-D-glucuronide)	山奈酚 3-O-β-(2''-O-乙酰基-β-D-葡萄糖醛酸)	Flavonoids	黄酮	Flavonols	黄酮醇	-	B	274000	233000	239000	376000	299000	333000	244000	239000	291000	309000	205000	282000	269000	239000	268000	265000	--	--
pmn001645	533.1	4.78	534.08	C24H22O14	[M-H]-	Isorhamnetin 3-O-β-(2''-O-acetyl-β-D-glucuronide)	异鼠李素3-O-β-(2''-O-乙酰基-β-D-葡萄糖醛酸)	Flavonoids	黄酮	Flavonols	黄酮醇	-	A	2410000	3650000	1970000	2570000	2060000	3150000	2400000	2180000	2150000	2670000	2100000	2300000	2340000	2360000	2380000	2240000	--	--
pmn001646	865.2	3.82	866.172	C45H38O18	[M-H]-	Procyanidin C1	原花青素 C1	Tannins	鞣质	Proanthocyanidins	原花青素	37064-30-5	A	446000	344000	334000	523000	336000	442000	404000	415000	462000	398000	455000	317000	386000	437000	400000	420000	C17624	--
pmn001650	1153.3	3.62	1154.22	C60H50O24	[M-H]-	Cinnamtannin B2	肉桂单宁 B2	Tannins	鞣质	Proanthocyanidins	原花青素	88038-12-4	B	73700	64900	37500	54000	70200	68500	50500	65400	65900	59600	56000	46300	66700	63800	72100	54900	C17629	--
pmn001663	417.2	5.71	418.142	C22H26O8	[M-H]-	Syringaresinol	丁香树脂酚	Lignans and Coumarins	木脂素和香豆素	Lignans	木脂素	21453-69-0	A	19900	24600	26400	61300	38600	32500	37200	24200	30100	24200	28200	26300	33000	30900	31000	27600	C10889	--
pmn001667	577.1	4.28	578.12	C30H26O12	[M-H]-	Procyanidin B4	原花青素 B4	Tannins	鞣质	Proanthocyanidins	原花青素	29106-51-2	B	879000	695000	678000	790000	707000	781000	1730000	1430000	1690000	643000	783000	972000	866000	835000	782000	804000	C10238	--
pmn001668	415.1	3.68	416.128	C22H24O8	[M-H]-	Apigenin-3-O-α-L-rhamnoside	芹菜素-3-O-α-L-鼠李糖苷	Flavonoids	黄酮	Flavonoid	黄酮	-	B	73000	92700	87900	68300	82600	77200	87100	99900	110000	90000	82600	99200	88200	82600	85800	83100	--	--
pmn001686	287.23	6.64	288.208	C16H32O4	[M-H]-	10,16-Dihydroxy-palmitic acid	10,16-二羟基棕榈酸	Lipids	脂质	Free fatty acids	游离脂肪酸	3233-90-7	A	67800	57500	66000	197000	249000	145000	191000	160000	128000	134000	120000	134000	135000	130000	134000	127000	--	--
pmn001688	295.23	7.97	296.214	C18H32O3	[M-H]-	9S-Hyroxy-10E,12E-octadecadienoic acid	9S-羟基-10E,12E-十八碳二烯酸	Lipids	脂质	Free fatty acids	游离脂肪酸	-	A	1610000	1630000	1520000	1720000	1760000	1940000	1140000	1310000	1140000	848000	741000	879000	1380000	1450000	1400000	1330000	--	--
pmn001689	311.22	6.35	312.208	C18H32O4	[M-H]-	9-Hydroxy-12-oxo-10-octadecenoic acid	9-羟基-12-氧代-10-十八酸	Lipids	脂质	Free fatty acids	游离脂肪酸	-	B	30400	32300	33000	34600	41600	43600	33500	29400	24400	23900	23900	27000	38100	37300	36900	36700	--	--
pmn001691	327.22	6.12	328.202	C18H32O5	[M-H]-	9,12,13-Trihyroxy-10,15-octadecadienoic acid	9,12,13-三羟基-10,15-十八二烯酸	Lipids	脂质	Free fatty acids	游离脂肪酸	-	A	63200	60200	65300	134000	170000	152000	92000	99700	93800	54600	38200	46700	91900	98800	95200	95200	--	--
pmn001694	329.23	6.41	330.217	C18H34O5	[M-H]-	9,10,13-Trihyroxy-11-octadecadienoic acid	9,10,13-三羟基-11-十八二烯酸	Lipids	脂质	Free fatty acids	游离脂肪酸	-	A	299000	304000	316000	564000	641000	647000	460000	509000	443000	282000	238000	285000	431000	446000	436000	421000	--	--
pmn001695	371.1	3.96	372.088	C16H20O10	[M-H]-	Trihydroxycinnamoylquinic acid	三羟基肉桂酰奎尼酸	Phenolic acids	酚酸类	Phenolic acids	酚酸类	-	B	156000	141000	159000	142000	223000	168000	123000	186000	214000	142000	115000	153000	172000	164000	173000	174000	--	--
pmn001705	471.35	8.16	472.323	C30H48O4	[M-H]-	3,24-Dihydroxy-17,21-semiacetal-12(13)oleanolic fruit	3,24-二羟基-17,21-半缩醛基-12(13)齐墩果	Terpenoids	萜类	Triterpene	三萜	-	A	9	9	9	9	9	9	9	9	9	476000	54500	76400	46100	47100	52000	32900	--	--
pmn001707	485.33	6.25	486.303	C30H46O5	[M-H]-	Quillaic acid	皂皮酸	Phenolic acids	酚酸类	Phenolic acids	酚酸类	631-01-6	A	880000	962000	1600000	479000	160000	420000	1300000	630000	1560000	375000	288000	384000	810000	899000	879000	801000	C08972	--
pmn001713	593.17	3.65	594.132	C27H30O15	[M-H]-	Luteolin-7-O-β-D-rutinoside	木犀草素-7-O-β-D-芸香糖苷	Flavonoids	黄酮	Flavonoid	黄酮	-	B	129000	121000	58400	323000	547000	247000	156000	105000	144000	240000	292000	356000	187000	182000	198000	199000	--	--
pmp000001	301.07	6.24	300.053	C16H12O6	[M+H]+	Hispidulin	高车前素	Flavonoids	黄酮	Flavonoid	黄酮	1447-88-7	A	568000	255000	354000	717000	673000	764000	759000	369000	304000	795000	403000	738000	526000	575000	548000	579000	C10058	--
pmp000004	331.08	6.4	330.061	C17H14O7	[M+H]+	Jaceosidin	棕矢车菊素	Flavonoids	黄酮	Anthocyanins	花青素	18085-97-7	A	223000	187000	167000	388000	503000	338000	266000	162000	181000	333000	302000	286000	276000	365000	325000	264000	--	--
pmp000008	359.11	6.51	358.09	C19H18O7	[M+H]+	5-Hydroxy-6,7,3',4'-tetramethoxyflavone	5-羟基-6,7,3',4'-四甲氧基黄酮	Flavonoids	黄酮	Flavonoid	黄酮	21763-80-4	B	4850000	4320000	4330000	4110000	2860000	2940000	1330000	1220000	768000	2760000	4390000	3530000	2900000	3770000	3270000	3130000	--	--
pmp000116	433.1	4.36	432.088	C21H20O10	[M+H]+	Apigenin-8-C-glucoside	芹菜素-8-C-葡萄糖苷	Flavonoids	黄酮	Flavonoid carbonoside	黄酮碳糖苷	3681-93-4	A	1640000	1160000	762000	2890000	2960000	1950000	692000	508000	870000	2060000	1470000	1980000	1230000	1580000	2040000	1090000	C01460	ko00941,ko00944
pmp000126	611.2	3.52	610.126	C27H30O16	[M+H]+	Luteolin-6,8-di-C-glucoside	木犀草素-6,8-二-C-葡萄糖苷	Flavonoids	黄酮	Flavonoid	黄酮	29428-58-8	B	47300	28100	37700	82900	90300	63400	52300	40700	34700	36500	64900	26600	58500	75800	48800	60300	--	--
pmp000231	339.1	3.83	338.085	C16H18O8	[M+H]+	Trans-3-O-p-coumaric quinic acid	trans-3-O-对香豆酰奎尼酸	Phenolic acids	酚酸类	Phenolic acids	酚酸类	-	A	4710000	4440000	4740000	6250000	7300000	7140000	6670000	7710000	7920000	4100000	4500000	4520000	6040000	6900000	6680000	5930000	--	--
pmp000232	339.1	3.36	338.085	C16H18O8	[M+H]+	Cis-3-p-coumaric quinic acid	顺-3-对香豆酰奎尼酸	Phenolic acids	酚酸类	Phenolic acids	酚酸类	-	A	4840000	5360000	5770000	7530000	10900000	7610000	4490000	3560000	3900000	4400000	3920000	4090000	5670000	6750000	5580000	5990000	--	--
pmp000236	565.1	4.12	564.123	C26H28O14	[M+H]+	Apigenin-6-C-glucose-8-xylcose	芹菜素-6-C-葡萄糖-8-木糖	Flavonoids	黄酮	Flavonoid carbonoside	黄酮碳糖苷	-	B	152000	153000	90500	246000	432000	166000	274000	170000	229000	121000	162000	239000	165000	184000	217000	238000	--	--
pmp000237	579.13	4.37	578.103	C26H26O15	[M+H]+	Apigenin-6-C-2-glucuronylxyloside	芹菜素-6-C-2-葡萄糖醛酸基木糖苷	Flavonoids	黄酮	Flavonoid carbonoside	黄酮碳糖苷	-	B	251000	326000	205000	523000	545000	223000	229000	144000	251000	125000	207000	250000	313000	306000	304000	314000	--	--
pmp000274	579.15	3.87	578.12	C30H26O12	[M+H]+	Procyanidin B3	原花青素 B3	Tannins	鞣质	Proanthocyanidins	原花青素	23567-23-9	A	295000	245000	314000	259000	178000	242000	299000	279000	264000	201000	260000	217000	270000	283000	262000	250000	--	--
pmp000280	867.21	3.45	866.172	C45H38O18	[M+H]+	Procyanidin C2	原花青素 C2	Tannins	鞣质	Proanthocyanidins	原花青素	37064-31-6	B	350000	276000	320000	342000	431000	334000	402000	367000	314000	281000	303000	380000	412000	387000	488000	454000	--	--
pmp000411	565.15	4.07	564.123	C26H28O14	[M+H]+	Genistein 8-C-apiosyl(1→6)glucoside	金雀异黄素 8-c-己糖基(1→6)葡萄糖苷	Flavonoids	黄酮	Flavonoid carbonoside	黄酮碳糖苷	-	B	501000	502000	316000	862000	1120000	684000	410000	306000	411000	653000	463000	834000	645000	760000	688000	667000	--	--
pmp000413	433.11	4.23	432.088	C21H20O10	[M+H]+	Genistein 8-C-glucoside	金雀异黄素 8-C-葡萄糖苷	Flavonoids	黄酮	Flavonoid carbonoside	黄酮碳糖苷	66026-80-0	A	1600000	1920000	1240000	4660000	5800000	2660000	1000000	635000	1080000	3660000	3150000	3310000	2230000	1960000	2870000	2490000	C10420	--
pmp000544	355.1	3.39	354.079	C16H18O9	[M+H]+	Chlorogenic Acid	绿原酸	Phenolic acids	酚酸类	Phenolic acids	酚酸类	327-97-9	A	9280000	9590000	8500000	9310000	11500000	10200000	12500000	12200000	11100000	8790000	9280000	9120000	11200000	10800000	10900000	10000000	C00852	ko00940,ko00941,ko00945,ko01110
pmp000548	301.07	6.37	300.053	C16H12O6	[M+H]+	Pratensein	红车轴草素	Flavonoids	黄酮	Isoflavones	异黄酮	2284-31-3	B	534000	283000	361000	670000	745000	920000	785000	382000	350000	940000	461000	744000	559000	694000	513000	617000	C10520	ko00943
pmp000562	257.1	6.14	256.064	C15H12O4	[M+H]+	Pinocembrin	松黄烷酮	Flavonoids	黄酮	Dihydroflavone	二氢黄酮	480-39-7	A	29300	30100	36100	31200	28700	55500	63700	100000	105000	63700	32500	28000	47400	53600	50200	51200	C09827	ko00941
pmp000571	271.06	6.13	270.044	C15H10O5	[M+H]+	Apigenin	芹菜素	Flavonoids	黄酮	Flavonoid	黄酮	520-36-5	B	38400	41700	33700	89900	95300	103000	43600	36000	35600	65600	56000	58500	53500	62000	62900	56400	C01477	ko00941,ko00943,ko00944,ko01100,ko01110
pmp000573	447.12	5.66	446.102	C22H22O10	[M+H]+	Acacetin-7-O-galactoside	金合欢素-7-O-半乳糖苷	Flavonoids	黄酮	Flavonoid	黄酮	-	B	98900	72500	89400	164000	192000	162000	111000	61200	97300	213000	154000	168000	119000	144000	114000	123000	--	--
pmp000575	447.13	5.66	446.102	C22H22O10	[M+H]+	Tilianin(Acacetin-7-O-β-D-glucoside)	煅树素(金合欢素-7-O-β-D-葡萄糖苷)	Flavonoids	黄酮	Flavonoid	黄酮	4291-60-5	B	36600	35100	38400	71600	71300	61900	47700	22000	43200	85600	70000	71200	43200	63000	52800	52800	--	--
pmp000579	463.12	4.87	462.096	C22H22O11	[M+H]+	Diosmetin-7-O-galactoside	香叶木素-7-O-半乳糖苷	Flavonoids	黄酮	Flavonoid	黄酮	-	A	408000	354000	371000	692000	780000	672000	1350000	771000	1080000	874000	980000	1240000	737000	814000	688000	634000	--	--
pmp000580	465.1	4.31	464.076	C21H20O12	[M+H]+	Isoquercitrin(Quercetin 3-O-β-D-glucoside)	异槲皮苷(槲皮素 3-O-β-D-葡萄糖苷)	Flavonoids	黄酮	Flavonols	黄酮醇	482-35-9	A	5880000	5430000	7490000	7070000	7830000	7770000	10200000	7990000	9360000	7490000	8460000	10000000	8430000	7040000	8200000	7630000	--	--
pmp000587	535.11	4.71	534.08	C24H22O14	[M+H]+	Luteolin-7-O-(6'-O-malonyl)-β-D-glucoside	木犀草素-7-O-(6''-O-丙二酰基)-β-D-葡萄糖苷	Flavonoids	黄酮	Flavonoid	黄酮	-	A	4020	5000	3490	4050	3460	5880	4400	2580	3490	4380	3540	3950	5090	7160	5670	4050	--	--
pmp000589	551.1	4.63	550.074	C24H22O15	[M+H]+	Quercetin-7-O-(6'-O-malonyl)-β-D-glucoside	槲皮素-7-O-(6''-O-丙二酰基)-β-D-葡萄糖苷	Flavonoids	黄酮	Flavonols	黄酮醇	-	A	739000	1370000	854000	1100000	871000	1100000	1110000	1250000	995000	713000	1170000	827000	1040000	1240000	1140000	1120000	--	--
pmp000593	595.16	4.26	594.132	C27H30O15	[M+H]+	Luteolin-7-O-rutinoside	木犀草素-7-O-芸香糖苷	Flavonoids	黄酮	Flavonoid	黄酮	3563-98-2	B	19600000	25600000	26800000	27600000	31500000	30600000	21000000	20000000	17700000	35500000	27200000	29300000	27600000	31300000	29500000	32000000	--	--
pmp000595	611.16	3.81	610.126	C27H30O16	[M+H]+	Luteolin-7,3'-Di-O-β-D-Glucoside	木犀草素-7,3′-二-O-β-D-葡萄糖苷	Flavonoids	黄酮	Flavonoid	黄酮	257-724-7	B	33600	17400	9450	38000	112000	41700	72600	33300	49100	10800	39500	58200	42600	80200	45100	39100	--	--
pmp000596	627.15	3.37	626.12	C27H30O17	[M+H]+	Quercetin 3,7-bis-O-β-D-glucoside	槲皮素 3,7-二-O-β-D-葡萄糖苷	Flavonoids	黄酮	Flavonols	黄酮醇	-	B	26600	34000	59600	36300	34800	43500	44500	23800	36700	36500	64400	49200	30100	51500	53900	44300	--	--
pmp000682	538.22	4.9	520.168	C26H32O11	[M+NH4]+	Matairesinoside	罗汉松树脂酚甙	Lignans and Coumarins	木脂素和香豆素	Lignans	木脂素	23202-85-9	B	193000	201000	306000	247000	159000	215000	283000	273000	317000	126000	153000	124000	216000	250000	226000	205000	--	--
pmp000700	449.1	3.99	448.082	C21H20O11	[M+H]+	Isoorientin	异红草素	Flavonoids	黄酮	Flavonoid carbonoside	黄酮碳糖苷	4261-42-1	B	489000	389000	306000	809000	688000	453000	299000	187000	290000	275000	690000	626000	491000	525000	540000	488000	C01821	--
pmp001079	595.16	4.25	594.132	C27H30O15	[M+H]+	Lonicerin	忍冬苷	Flavonoids	黄酮	Flavonoid	黄酮	20633-84-5	B	1350000	2010000	1580000	1930000	2130000	2250000	1380000	1150000	1570000	2570000	1820000	2170000	1940000	2030000	1830000	1710000	C17557	--
pmp001106	595.17	3.61	594.132	C27H30O15	[M+H]+	Vitexin-2-O-D-glucopyranoside	牡荆素-2-O-D-吡喃葡萄糖苷	Flavonoids	黄酮	Flavonoid carbonoside	黄酮碳糖苷	-	B	123000	98800	47700	256000	375000	170000	78000	70900	75600	144000	178000	226000	156000	157000	158000	141000	--	--
pmp001110	535.14	4.17	534.114	C25H26O13	[M+H]+	Apigenin-6-C-β-D-xyloside-8-C-β-Darabinoside	芹菜素-6-C-β-d-木糖苷-8-C-β-D-阿拉伯糖苷	Flavonoids	黄酮	Flavonoid carbonoside	黄酮碳糖苷	-	A	1460000	1310000	808000	2990000	4810000	1410000	2000000	1260000	1590000	2330000	1820000	3240000	1790000	2090000	2400000	2790000	--	--
pmp001198	132.1	1.7	131.085	C6H13NO2	[M+H]+	6-Deoxyfagomine	6-脱氧荞麦碱	Alkaloids	生物碱	Alkaloids	生物碱	197449-09-5	A	889000	1070000	767000	1500000	1050000	914000	164000	155000	212000	238000	178000	409000	687000	772000	1340000	1380000	--	--
pmp001213	166.08	2.41	165.07	C9H11NO2	[M+H]+	Phenylalanine	苯丙氨酸	Amino acids and derivatives	氨基酸及其衍生物	Amino acids and derivatives	氨基酸及其衍生物	63-91-2	A	7370000	6720000	6050000	8270000	8760000	8370000	2620000	2640000	2560000	2620000	2510000	2340000	6620000	7850000	7320000	7350000	C00079	ko00360,ko00400,ko00460,ko00940,ko00960,ko00966,ko00970,ko01100,ko01110,ko01210,ko01230,ko02010
pmp001250	520.34	7.42	520.304	C26H51NO7P+	[M]+	PC(18:2)	磷脂酰胆碱(18:2)	Lipids	脂质	PC	磷脂酰胆碱	-	A	11400000	11900000	12400000	10500000	12800000	11200000	7810000	9350000	8190000	5350000	5870000	5320000	11200000	11400000	11200000	10600000	--	--
pmp001251	520.34	7.24	520.304	C26H51NO7P+	[M]+	PC(18:2)isomer	磷脂酰胆碱(18:2)异构体	Lipids	脂质	PC	磷脂酰胆碱	-	B	947000	989000	954000	1150000	1130000	1290000	1100000	1020000	1150000	1050000	1090000	1010000	1100000	1100000	1140000	1060000	--	--
pmp001259	526.34	4.38	525.296	C28H47NO8	[M+H]+	5,8,11,14-Pentadecanoamide	5,8,11,14-十五烷酰胺	Others	其它类	Others	其它	-	B	36600	32700	21900	44500	36800	52700	34400	18700	30600	55500	49000	42100	41200	26200	36700	36200	--	--
pmp001264	274.28	6.5	273.243	C16H35NO2	[M+H]+	Hexadecylsphingosine	十六烷基鞘胺醇	Lipids	脂质	Sphingolipids	鞘脂	-	A	9140000	9040000	7790000	10600000	11700000	10700000	9950000	10100000	7790000	8360000	8460000	8990000	9270000	9790000	9340000	9300000	--	--
pmp001270	494.33	7.08	493.282	C24H48NO7P	[M+H]+	LysoPC(16:2)	溶血磷脂酰胆碱(16:2)	Lipids	脂质	LPC	溶血磷脂酰胆碱	-	A	2290000	2380000	2340000	2530000	2960000	3040000	1690000	2340000	1720000	1160000	1060000	864000	2140000	3110000	2800000	2640000	--	--
pmp001271	679.39	7.32	678.339	C33H58O14	[M+H]+	2,3-Dihydroxypropyl-9,12-octadecadienoate-hexose-hexose	2,3-二羟基丙基-9,12-十八碳二酸酯-己糖-己糖	Lipids	脂质	Free fatty acids	游离脂肪酸	-	B	53200	57300	64800	74000	86600	56200	43300	36500	43500	27300	29100	28800	59700	67400	73400	65900	--	--
pmp001272	478.29	7.4	477.253	C23H44NO7P	[M+H]+	3-{(2-Aminoethoxy)(hydroxy)phosphoryl]oxy}-2-12-octadecadienoate	3-(2-氨基乙氧基)(羟基)磷酸]氧基-2-12-十八碳二酸酯	Alkaloids	生物碱	Alkaloids	生物碱	-	A	182000	179000	174000	140000	192000	183000	113000	142000	123000	73500	95600	73100	159000	173000	168000	172000	--	--
pmp001273	520.34	7.43	519.296	C26H50NO7P	[M+H]+	LysoPC(18:2)	溶血磷脂酰胆碱(18:2)	Lipids	脂质	LPC	溶血磷脂酰胆碱	-	A	12000000	12800000	12100000	12200000	13100000	13100000	7220000	8590000	7860000	4890000	5790000	5230000	10100000	11800000	11900000	11700000	--	--
pmp001275	672.42	7.7	671.363	C31H61O14N	[M+H]+	3-Hydroxypropyl palmitate glc-glucosamine	3-羟丙基棕榈酸酯葡萄糖胺	Alkaloids	生物碱	Alkaloids	生物碱	-	A	1530000	1610000	1610000	2110000	3010000	2340000	1520000	1640000	1240000	1170000	1130000	1150000	1880000	2360000	2050000	2040000	--	--
pmp001276	677.37	7.7	676.324	C33H56O14	[M+H]+	2,3-Dihydroxypropyl-9,12,15-octadecatrienoate-hexose-hexose	2,3-二羟基丙基-9,12,15-十八碳三酸酯-己糖-己糖	Lipids	脂质	Free fatty acids	游离脂肪酸	-	B	631000	648000	573000	904000	1020000	921000	632000	627000	485000	497000	552000	513000	807000	1050000	925000	1060000	--	--
pmp001277	454.3	7.76	453.253	C21H44NO7P	[M+H]+	3-{(2-Aminoethoxy)(hydroxy)phosphoryl]oxy}-2-hydroxypropyl palmitate	3-(2-氨基乙氧基)(羟基)磷酸]氧基-2-羟丙基棕榈酸酯	Alkaloids	生物碱	Alkaloids	生物碱	-	A	10600000	11300000	10900000	12600000	12200000	15500000	7070000	8470000	6770000	6590000	6200000	5300000	11100000	12800000	11700000	12600000	--	--
pmp001278	496.34	7.81	495.296	C24H50NO7P	[M+H]+	LysoPC(16:1)	溶血磷脂酰胆碱(16:1)	Lipids	脂质	LPC	溶血磷脂酰胆碱	-	A	9160000	9950000	8940000	9670000	10000000	11100000	4660000	5390000	4320000	4630000	4160000	3880000	8360000	10200000	9250000	8760000	--	--
pmp001281	522.36	8.12	521.311	C26H52NO7P	[M+H]+	LysoPC(18:1)	溶血磷脂酰胆碱(18:1)	Lipids	脂质	LPC	溶血磷脂酰胆碱	-	A	9880000	8650000	10400000	21200000	21900000	19800000	19200000	19800000	21500000	22400000	22000000	21100000	16700000	22400000	18500000	18800000	--	--
pmp001282	544.34	8.12	543.296	C28H50NO7P	[M+H]+	Propyl2-(trimethylammonio)ethyl phosphate	磷酸丙二(三甲铵)乙酯	Others	其它类	Others	其它	-	A	312000	266000	320000	620000	840000	639000	429000	509000	447000	312000	357000	293000	496000	752000	625000	667000	--	--
pmp001284	331.28	8.68	330.251	C19H38O4	[M+H]+	Glycerin Monopalmitate	甘油单棕榈酸酯	Lipids	脂质	Glycerol ester	甘油酯	542-44-9	A	9580	8210	6360	9100	13000	10000	7900	9550	7360	6810	6600	6510	11100	11500	12000	10500	--	--
pmp001285	149.02	8.71	148.012	C8H4O3	[M+H]+	Phthalic anhydride	邻苯二甲酸酐	Phenolic acids	酚酸类	Phenolic acids	酚酸类	85-44-9	A	449000	416000	437000	1050000	649000	491000	556000	590000	537000	647000	530000	597000	548000	682000	625000	584000	--	--
pmp001286	524.37	8.95	523.325	C26H54NO7P	[M+H]+	LysoPC(18:0)	溶血磷脂酰胆碱(18:0)	Lipids	脂质	LPC	溶血磷脂酰胆碱	-	A	1740000	1760000	1610000	2340000	2310000	2560000	939000	852000	694000	832000	791000	652000	1360000	2110000	1710000	1580000	--	--
pmp001309	465.1	4.15	464.076	C21H20O12	[M+H]+	6-Hydroxykaempferol-7-O-glucoside	6-羟基山奈酚-7-O-葡萄糖苷	Flavonoids	黄酮	Flavonols	黄酮醇	-	B	6290000	6600000	7460000	7940000	7250000	7290000	8130000	7780000	9040000	8490000	7860000	10100000	7960000	6890000	8120000	6320000	--	--
pmp001310	627.2	3.82	626.12	C27H30O17	[M+H]+	6-Hydroxykaempferol-3,6-O-Diglucoside	6-羟基山奈酚-3,6-O-二葡萄糖苷	Flavonoids	黄酮	Flavonols	黄酮醇	-	B	265000	309000	213000	468000	460000	498000	333000	314000	341000	368000	567000	349000	298000	365000	349000	405000	--	--
pmp001311	627.2	3.38	626.12	C27H30O17	[M+H]+	6-Hydroxykaempferol-7,6-O-Diglucoside	6-羟基山奈酚-7,6-O-二葡萄糖苷	Flavonoids	黄酮	Flavonols	黄酮醇	-	B	50000	36800	35800	35100	36700	34100	53300	25500	21200	39600	56300	39800	36400	50700	32100	30900	--	--
